# Supplementary material for: Cross species systems biology discovers glial DDR2, STOM, and KANK2 as therapeutic targets in progressive supranuclear palsy
Source: PubMed Central journal article supplement (PMC10622416; doi:10.1038/s41467-023-42626-3), 2023-11-02
Supplement: 41467_2023_42626_MOESM1_ESM.pdf [file 41467_2023_42626_MOESM1_ESM.pdf]

# Cross Species Systems Biology Discovers Glial *DDR2*, *STOM*, and *KANK2* as Therapeutic Targets in Progressive Supranuclear Palsy

## Supplementary Figures and Tables

Yuhao Min<sup>1,2,3</sup>, Xue Wang<sup>4</sup>, Özkan İş<sup>1</sup>, Tulsi A. Patel<sup>1</sup>, Junli Gao<sup>1</sup>, Joseph S. Reddy<sup>4</sup>, Zachary S. Quicksall<sup>4</sup>, Thuy Nguyen<sup>1</sup>, Shu Lin<sup>1</sup>, Frederick Q. Tutor-New<sup>1</sup>, Jessica L. Chalk<sup>1</sup>, Adriana O. Mitchell<sup>1</sup>, Julia E. Crook<sup>2</sup>, Peter T. Nelson<sup>5,6</sup>, Linda J. Van Eldik<sup>5,7</sup>, Todd E. Golde<sup>8</sup>, Minerva M. Carrasquillo<sup>1</sup>, Dennis W. Dickson<sup>1</sup>, Ke Zhang<sup>1</sup>, Mariet Allen<sup>1</sup>, Nilüfer Ertekin-Taner<sup>1,9#</sup>

### Author Affiliations:

1. Department of Neuroscience, Mayo Clinic, Jacksonville, Florida, USA
2. Center for Clinical and Translational Science, Mayo Clinic, Rochester, Minnesota, USA
3. Mayo Clinic Graduate School of Biomedical Sciences, Mayo Clinic, Jacksonville, Florida, USA
4. Department of Quantitative Health Sciences, Mayo Clinic, Jacksonville, Florida, USA
5. Sanders-Brown Center on Aging, University of Kentucky, Lexington, Kentucky, USA
6. Department of Pathology & Laboratory Medicine, University of Kentucky, Lexington, Kentucky, USA
7. Department of Neuroscience, University of Kentucky, Lexington, Kentucky, USA
8. Department of Pharmacology and Chemical Biology, Department of Neurology, Emory Center for Neurodegenerative Disease, Emory University, Atlanta, Georgia, USA
9. Department of Neurology, Mayo Clinic, Jacksonville, Florida, USA

# Corresponding author: [taner.nilufer@mayo.edu](mailto:taner.nilufer@mayo.edu)

---

|                         |           |
|-------------------------|-----------|
| <b>Figure S1</b> .....  | <b>4</b>  |
| <b>Figure S2</b> .....  | <b>5</b>  |
| <b>Figure S3</b> .....  | <b>6</b>  |
| <b>Figure S4</b> .....  | <b>7</b>  |
| <b>Figure S5</b> .....  | <b>8</b>  |
| <b>Figure S6</b> .....  | <b>9</b>  |
| <b>Figure S7</b> .....  | <b>10</b> |
| <b>Figure S8</b> .....  | <b>11</b> |
| <b>Figure S9</b> .....  | <b>13</b> |
| <b>Figure S10</b> ..... | <b>14</b> |
| <b>Figure S11</b> ..... | <b>15</b> |
| <b>Figure S12</b> ..... | <b>16</b> |
| <b>Figure S13</b> ..... | <b>17</b> |
| <b>Figure S14</b> ..... | <b>18</b> |
| <b>Figure S15</b> ..... | <b>19</b> |

|                         |           |
|-------------------------|-----------|
| <b>Figure S16</b> ..... | <b>20</b> |
| <b>Figure S17</b> ..... | <b>23</b> |
| <b>Figure S18</b> ..... | <b>25</b> |
| <b>Figure S19</b> ..... | <b>26</b> |
| <b>Figure S20</b> ..... | <b>27</b> |
| <b>Figure S21</b> ..... | <b>28</b> |
| <b>Table S1</b> .....   | <b>29</b> |
| <b>Table S2</b> .....   | <b>30</b> |
| <b>Table S3</b> .....   | <b>31</b> |
| <b>Table S4</b> .....   | <b>32</b> |
| <b>Table S5</b> .....   | <b>33</b> |
| <b>Table S6</b> .....   | <b>34</b> |
| <b>Table S7</b> .....   | <b>35</b> |
| <b>Table S8</b> .....   | <b>36</b> |
| <b>Table S9</b> .....   | <b>37</b> |
| <b>Table S10</b> .....  | <b>38</b> |

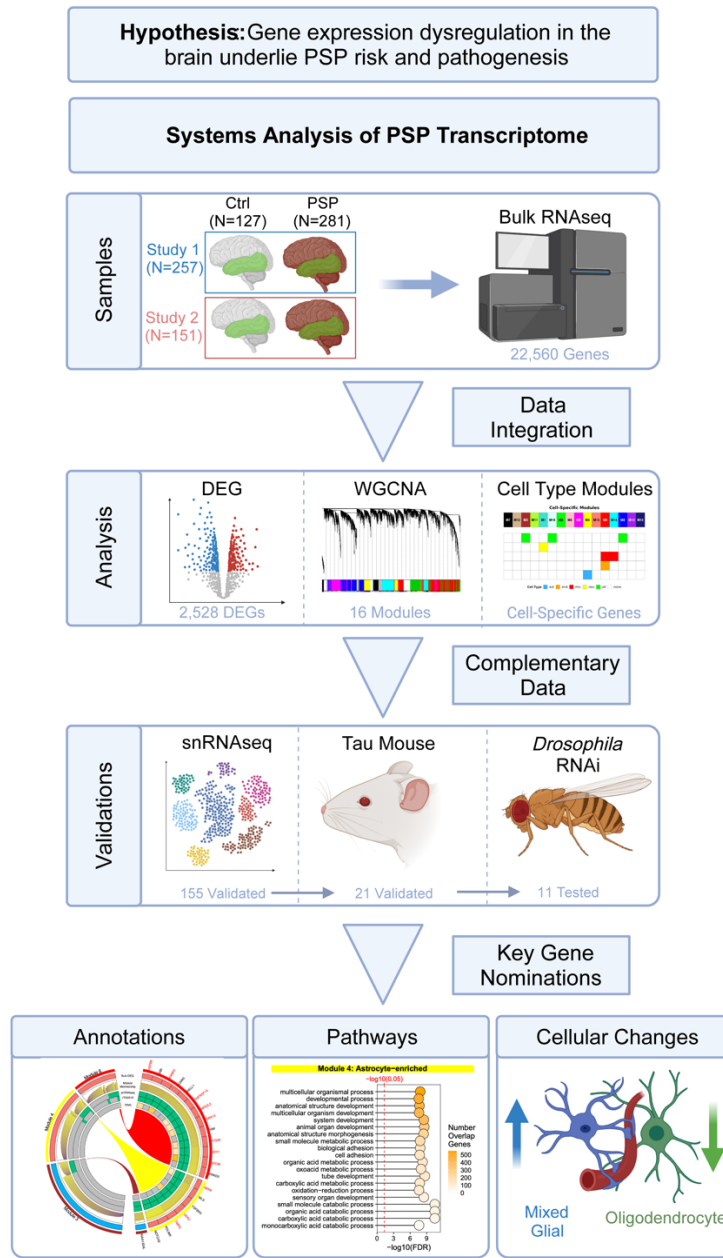

Created with BioRender.com

**Figure S-i.** Graphic abstract depicting the key steps and the overall workflow of this manuscript.

Distribution of median CQN values and expression threshold in Study 1 and Study 2

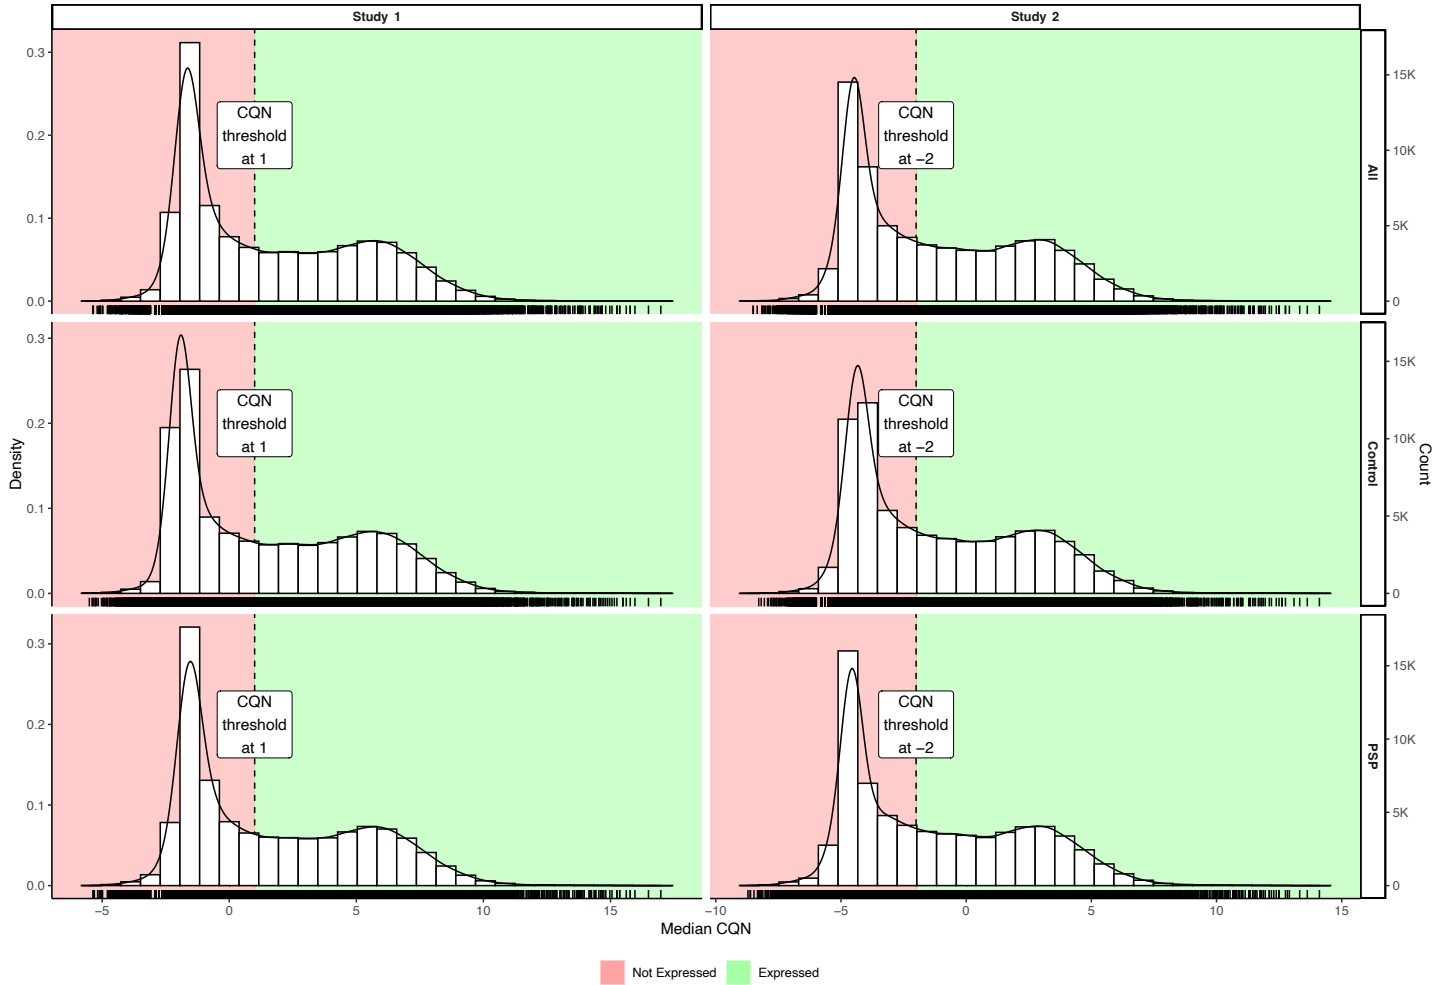

**Figure S1.** Distribution of the median conditional quantile normalization (CQN) value for each gene (Total genes = 54,991 before filtering) in the two bulk RNAseq cohorts. Based on the bimodal distribution, expression thresholds were chosen at 1 and -2 (dotted lines), respectively. Source data are provided as a Source Data file.

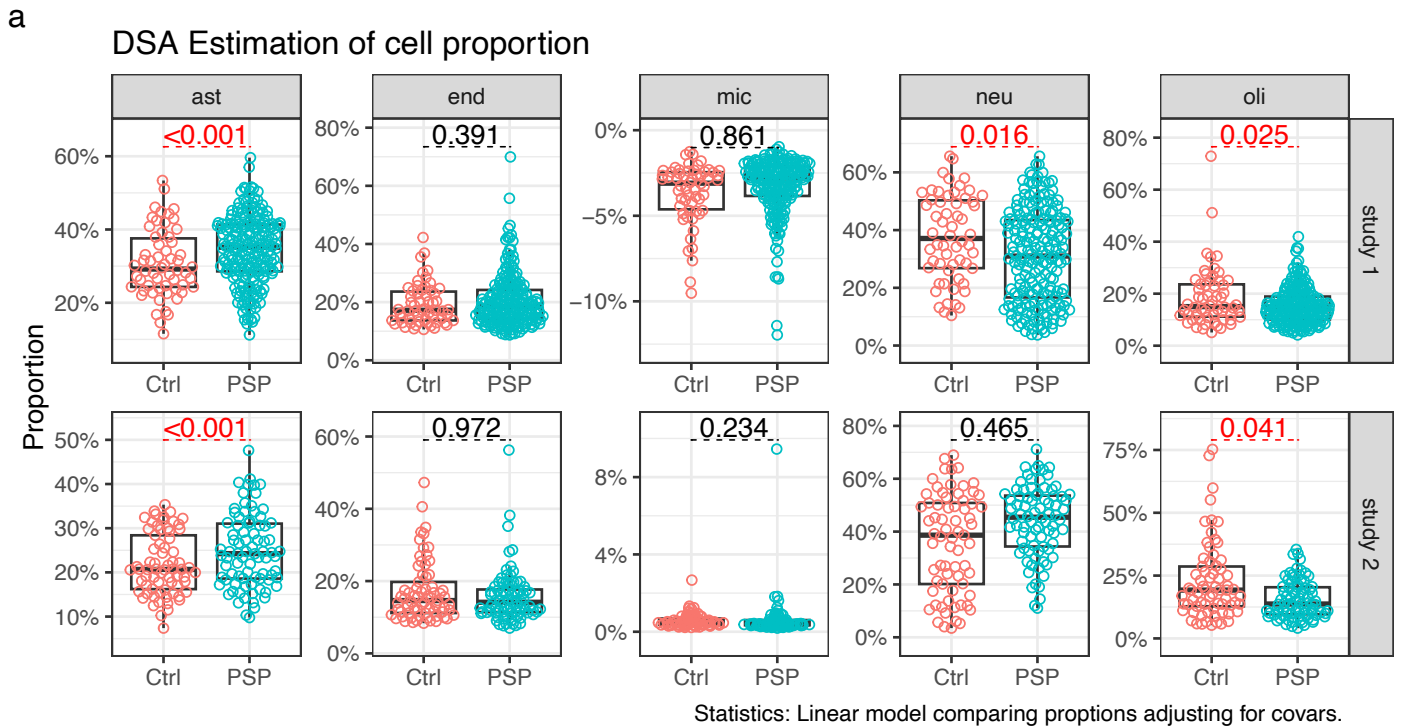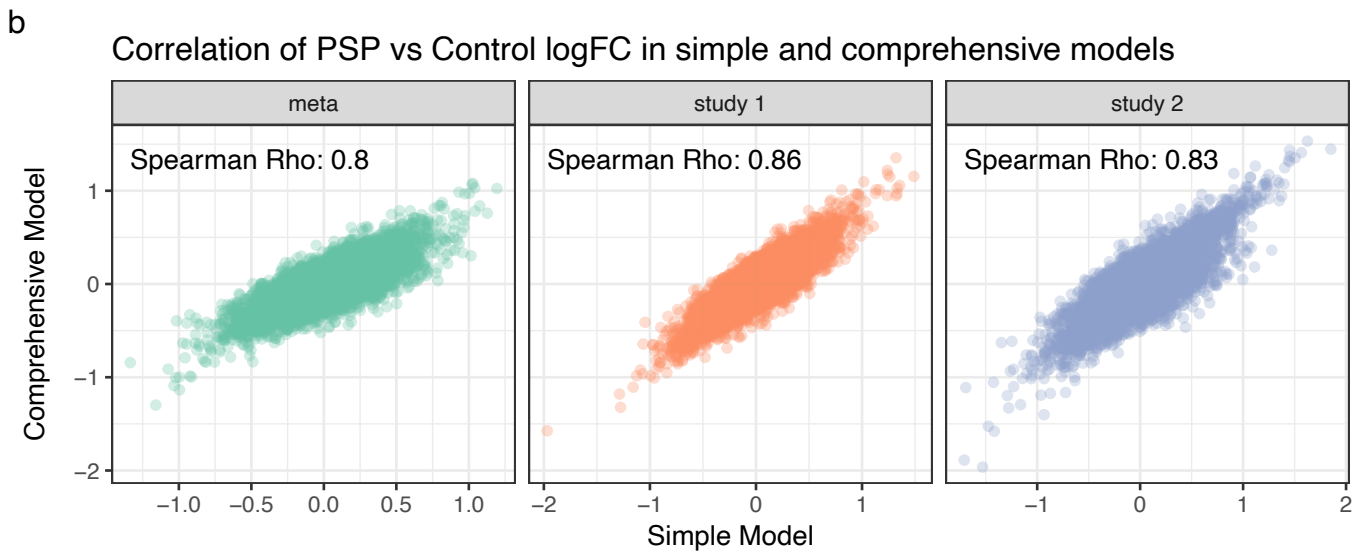

**Figure S2.** Secondary analysis of the bulk RNAseq data to assess cell proportion changes in PSP. **a:** Estimated cell proportions in PSP and control participants using the Digital Sorting Algorithm. Study 1: N = 257 PSP and Control individuals; Study 2: N = 151 PSP and Control individuals. **b:** Correlation between the PSP vs Control logFC derived from the Simple model (not adjusting for cell proportion) and the Comprehensive model (adjusting for cell proportion). N = 22,560 genes. Source data are provided as a Source Data file.

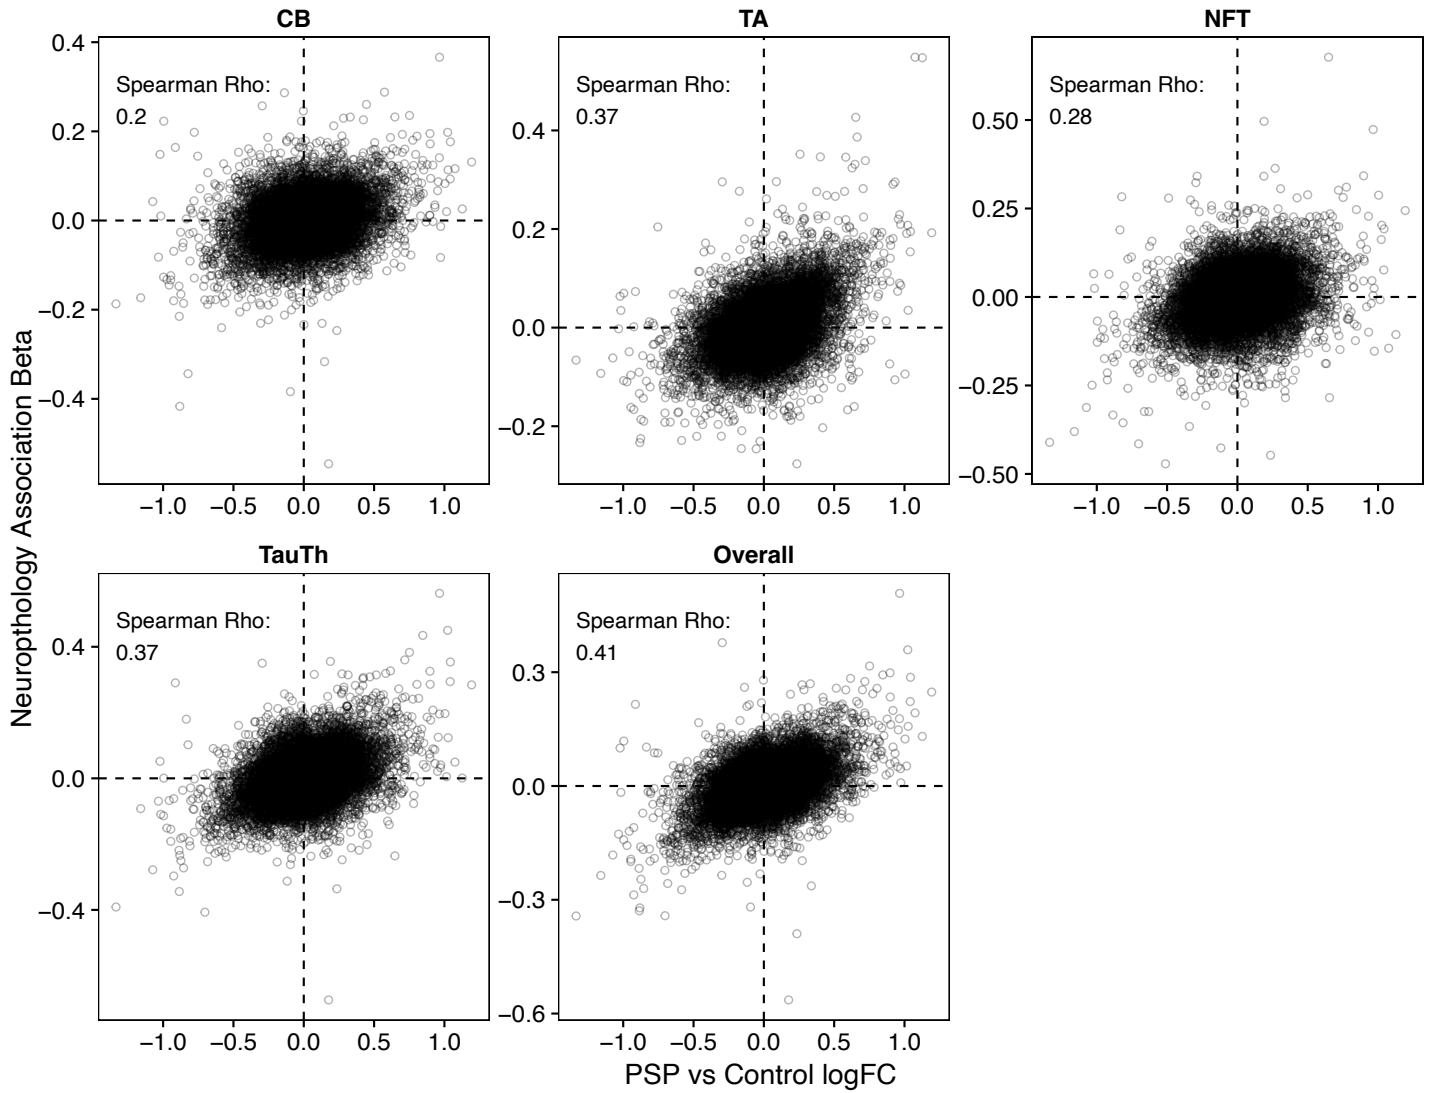

Stat: Spearman coefficient

**Figure S3.** Correlation between beta coefficients from PSP vs Control DEG and those from gene expression associations with quantitative tau neuropathology in PSP. Statistics: Spearman correlation. N = 22,560 genes. Source data are provided as a Source Data file.

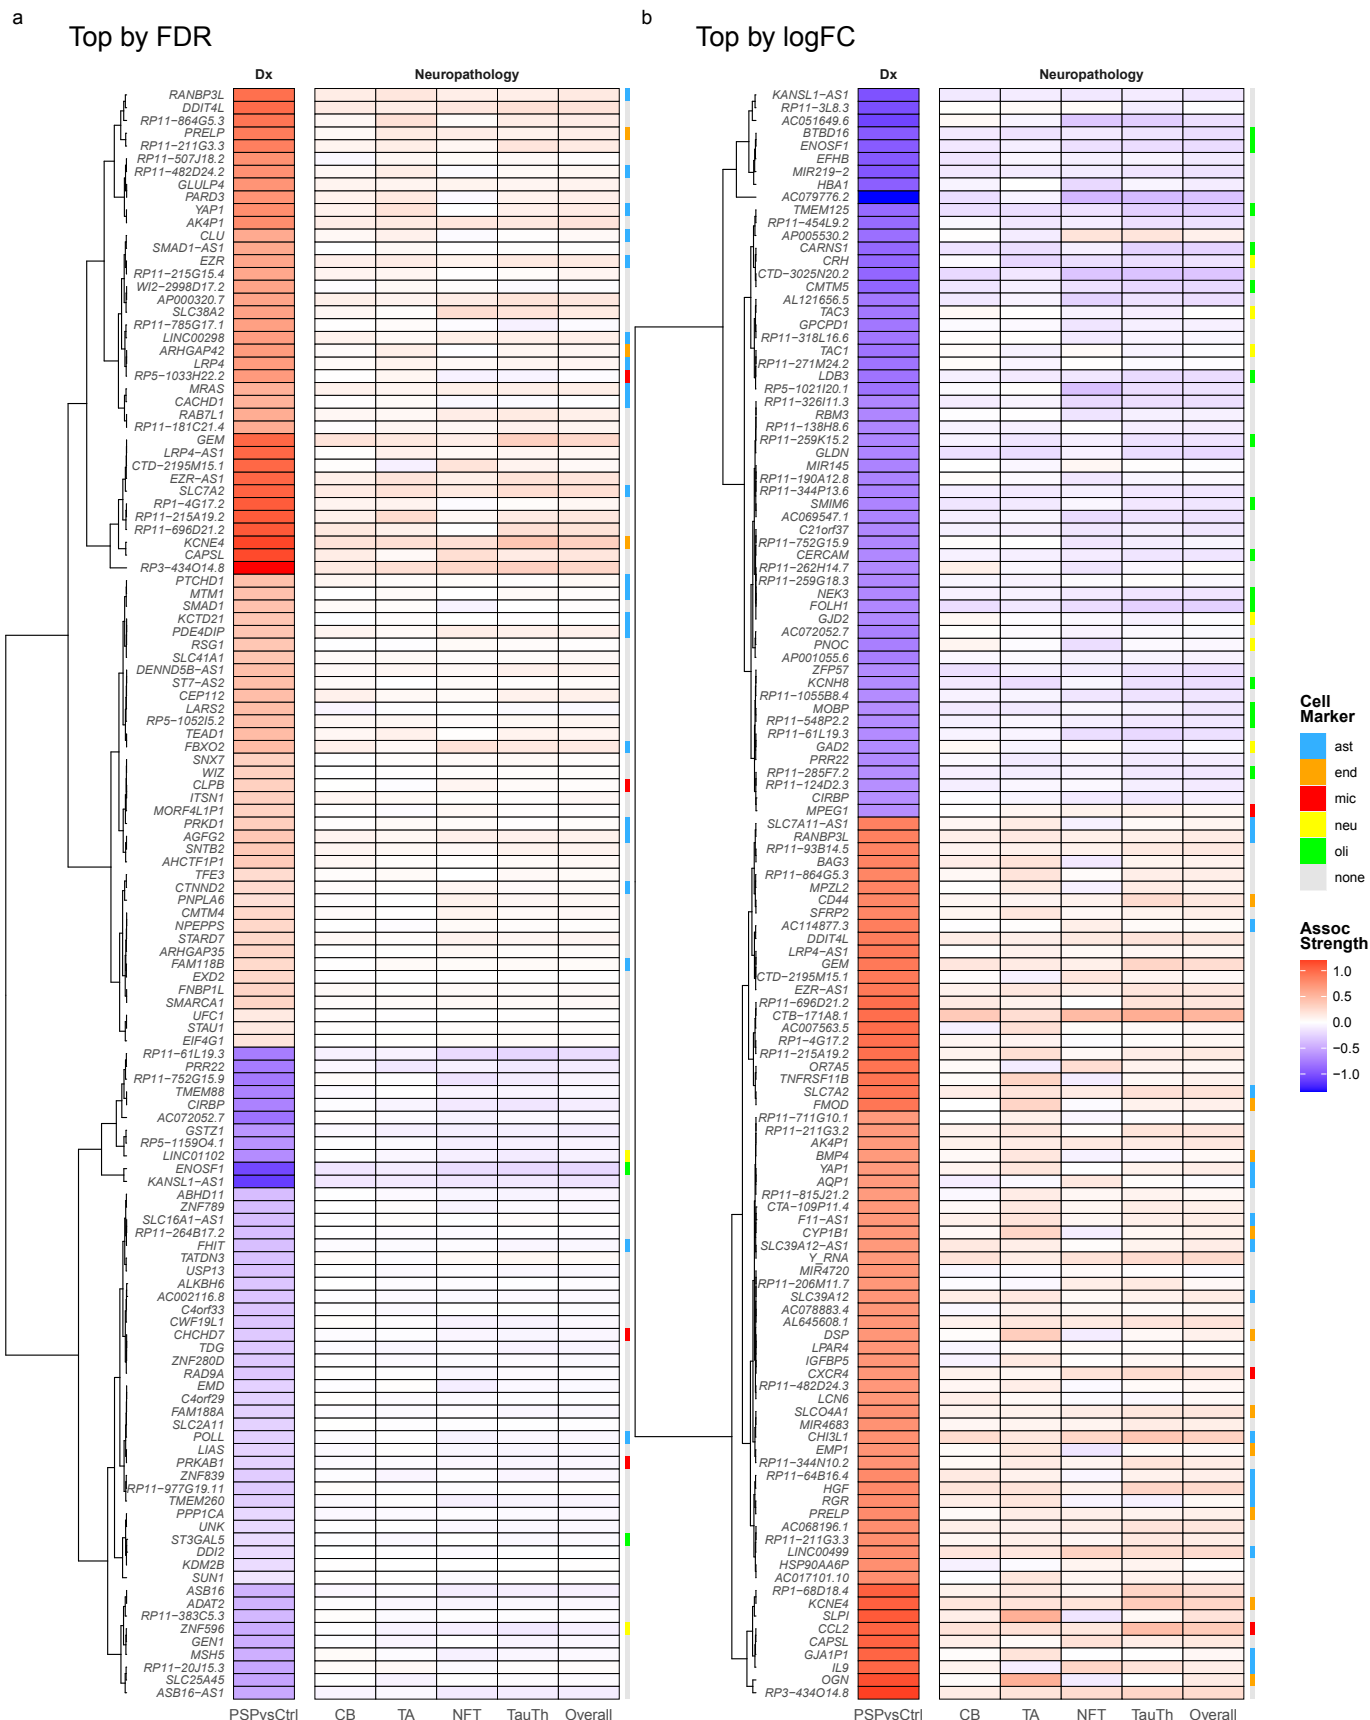

**Figure S4.** Heatmaps of bulk DEGs between PSP and control brains that represent **a** Lowest 5% FDR (most statistically significant) or **b** highest  $|\log_{2}FC|$  (largest expression difference). Source data are provided as a Source Data file.

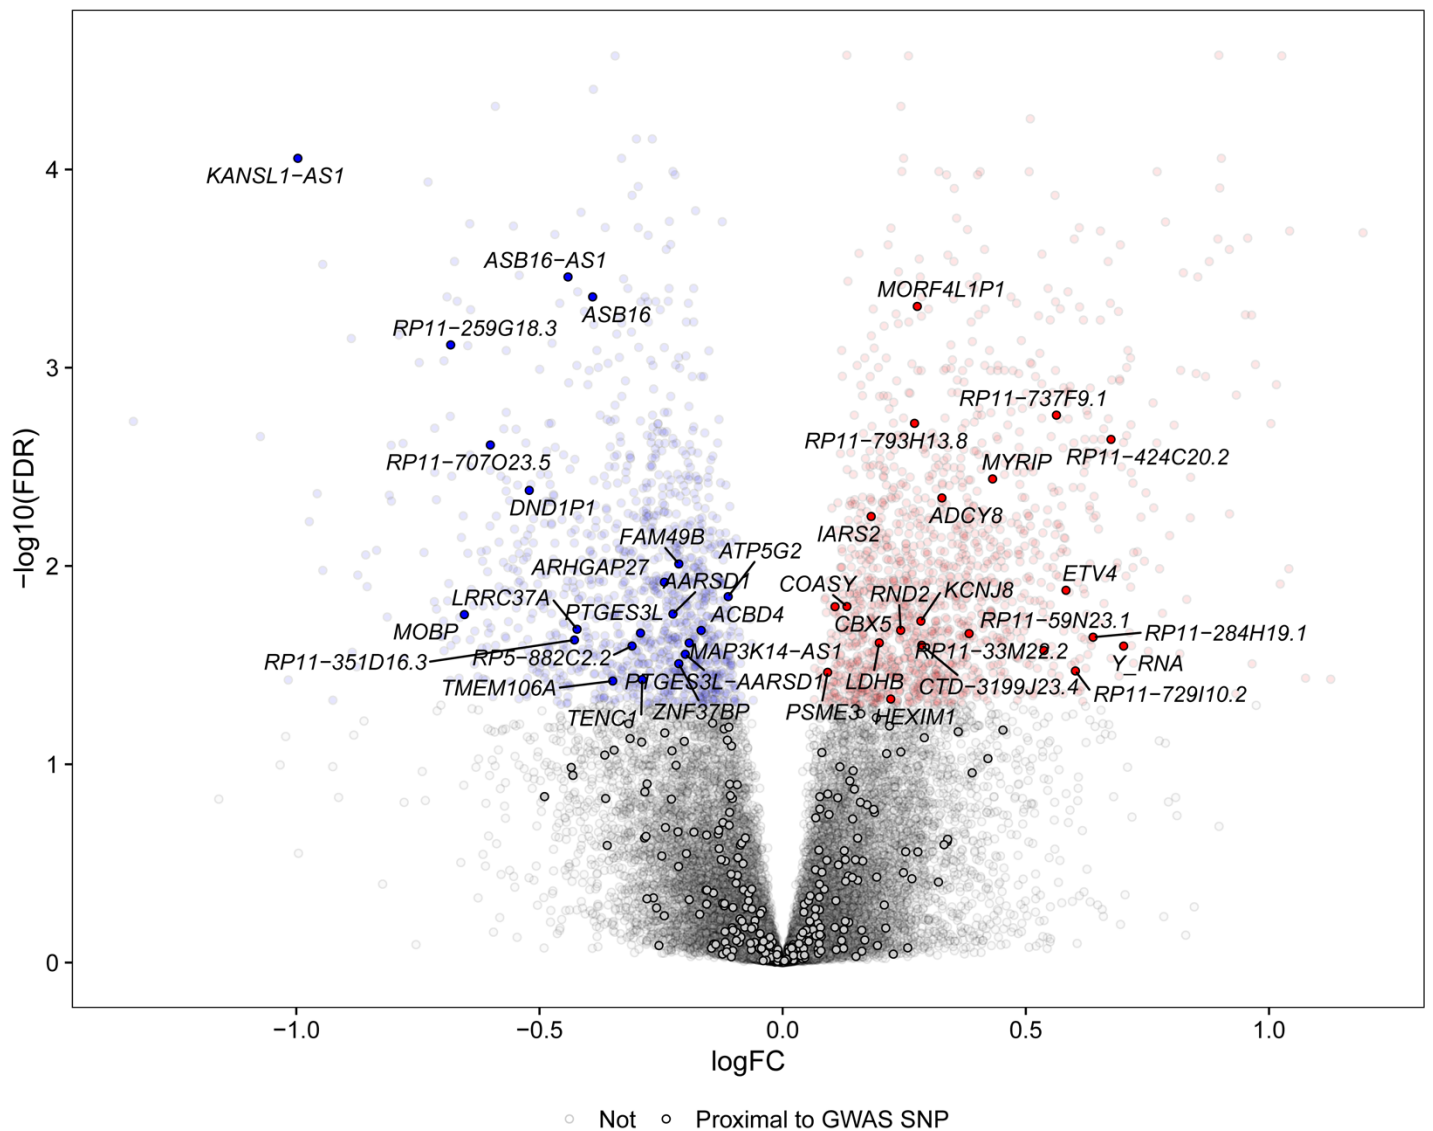

**Figure S5.** Volcano plot highlighting DEGs between PSP and control that are within 1 Mbp of PSP genetic risk loci from previous GWAS studies. Red dots:  $\log_{FC} > 0$  and  $FDR < 0.05$ , blue dots:  $\log_{FC} < 0$  and  $FDR < 0.05$ , gray:  $FDR > 0.05$ . Source data are provided as a Source Data file.



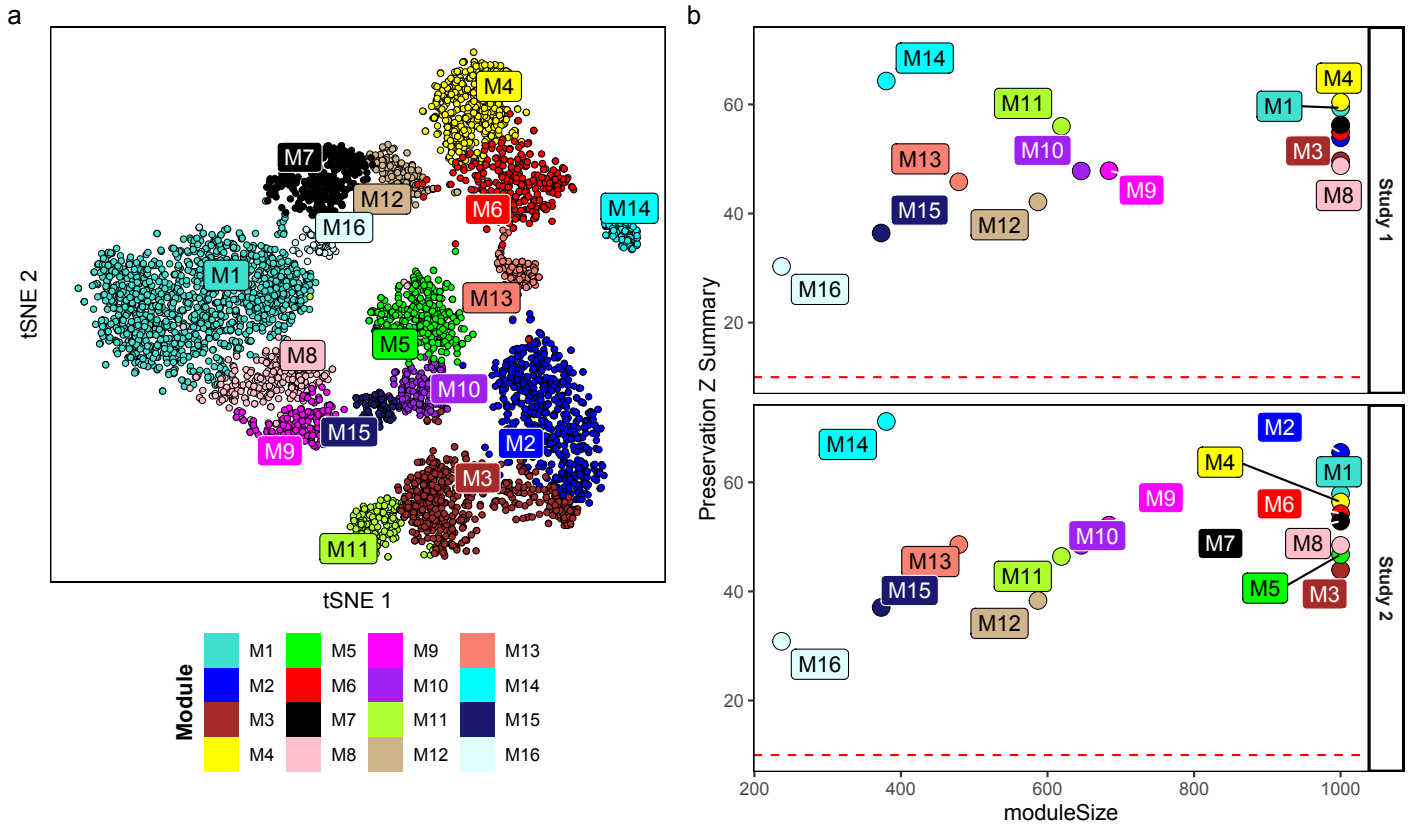

**Figure S6.** The consensus WGCNA network definition is robust. **a:** Independent embedding of the expression data in tSNE space showed high agreement between the gene cluster and module assignment. **b:** Module preservation analysis indicating all modules are well-preserved with a summary score above the threshold (10, red dotted line). Source data are provided as a Source Data file.

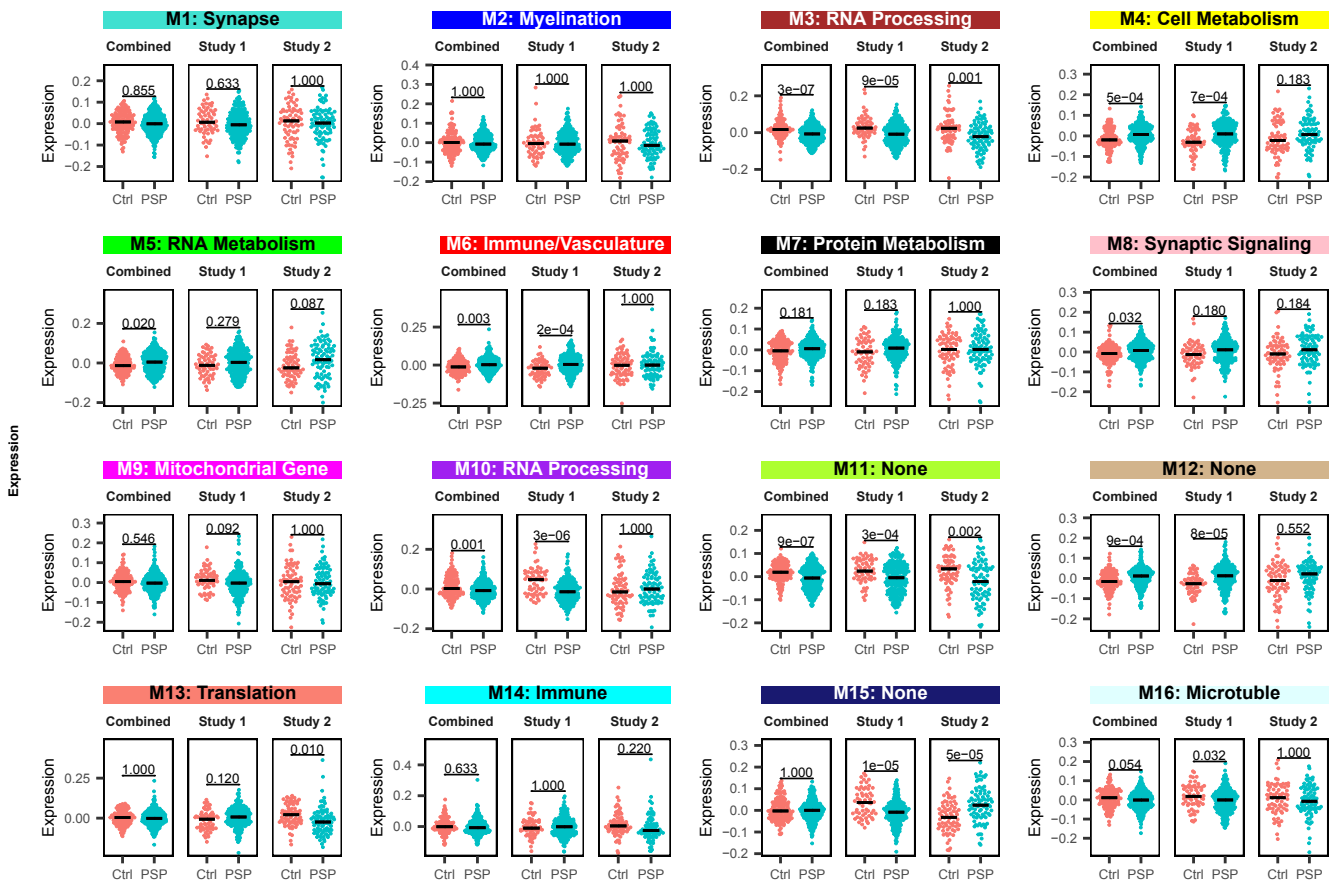

\*bonferroni adjusted p value for t-test

**Figure S7.** Module eigengene distribution between PSP and Control samples in study 1, study 2, and the consensus network for all 16 modules. Statistics: two-sided t-test comparing PSP and control module eigengenes. Bonferroni- adjusted p values are presented. Study 1: N = 257 PSP and Control individuals; Study 2: N = 151 PSP and Control individuals; Combined: N= 408 PSP and Control individuals.



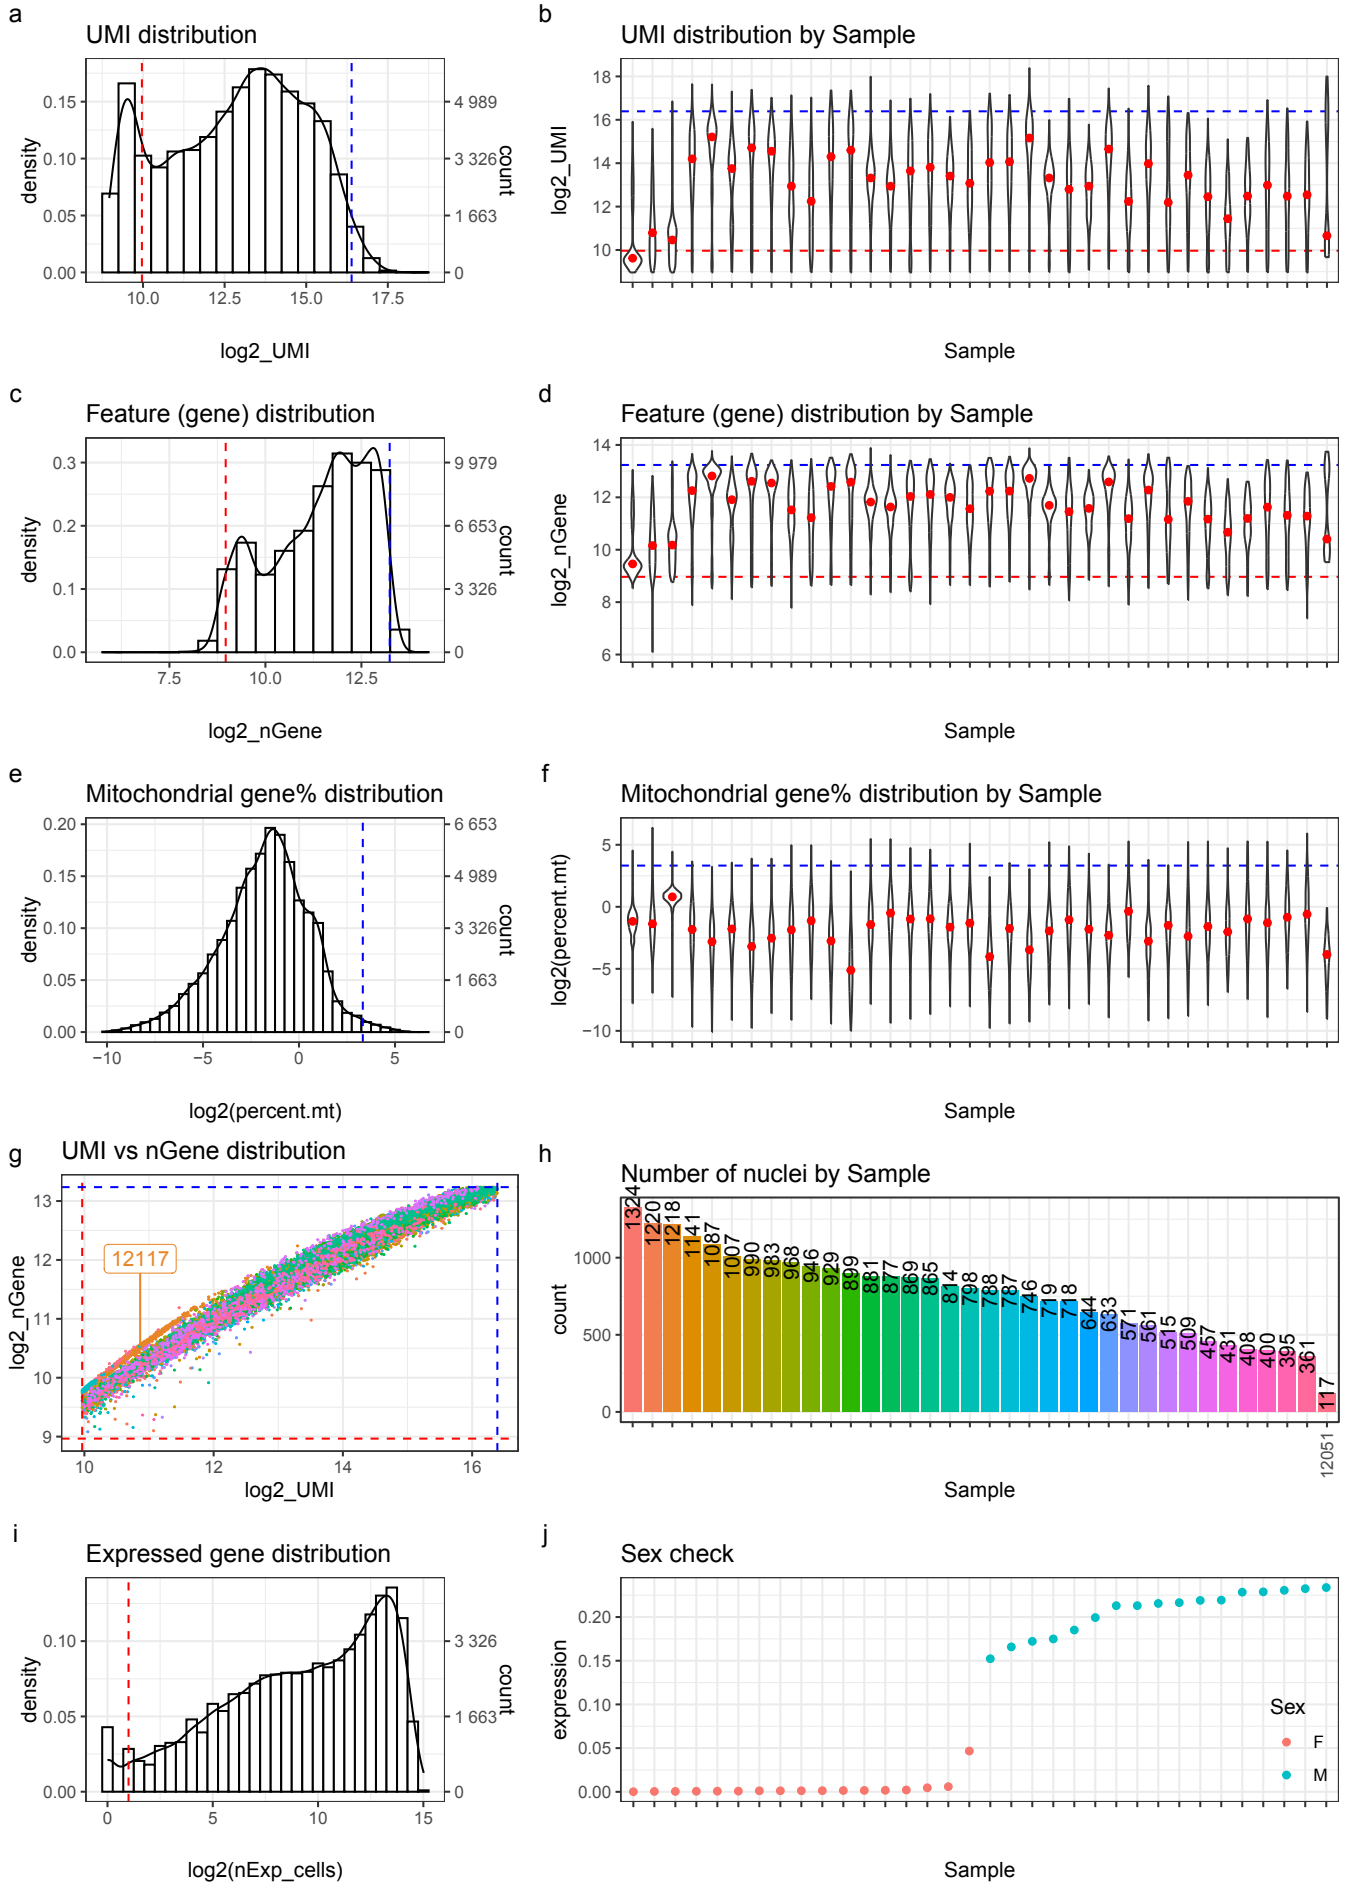

**Figure S9.** Quality-Control metrics for the snRNAseq analysis. **a-b:** Distribution of the number of mapped UMIs from all nuclei and in each sample. **c-d:** Distribution of the number of detected genes from all nuclei and in each sample. **e-f:** Distribution of the percent of mitochondrial genes from all nuclei and in each sample. **g:** Distribution of the number of mapped UMI vs the number of detected genes in each sample. **h:** Number of nuclei in each sample. **i:** Distribution of the number of nuclei that are expressing each gene. **j:** Expression of chromosome Y genes *RPS4Y1*, *EIF1AY*, *DDX3Y*, and *KDM5D*. Source data are provided as a Source Data file.

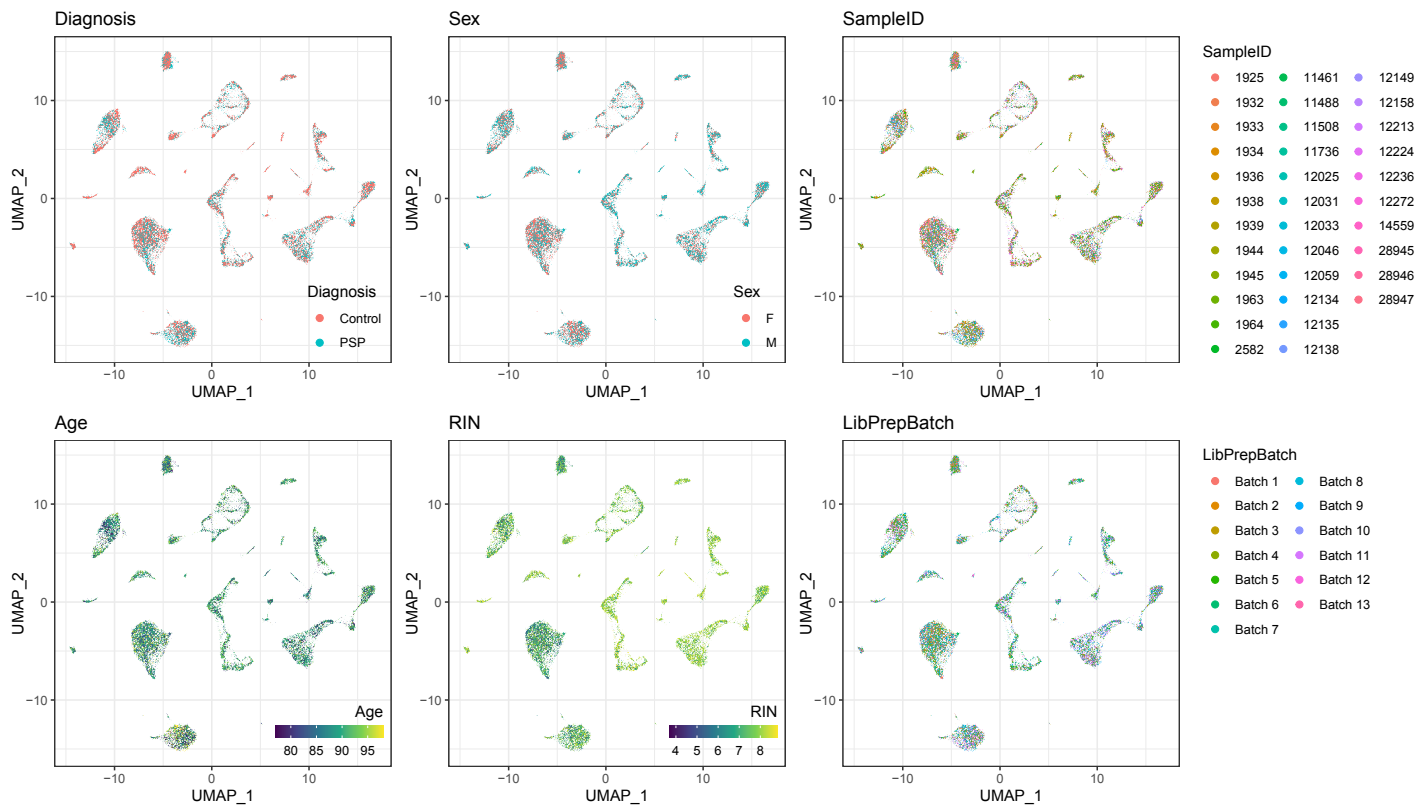

**Figure S10.** Nuclei in UMAP space colored by different variables.

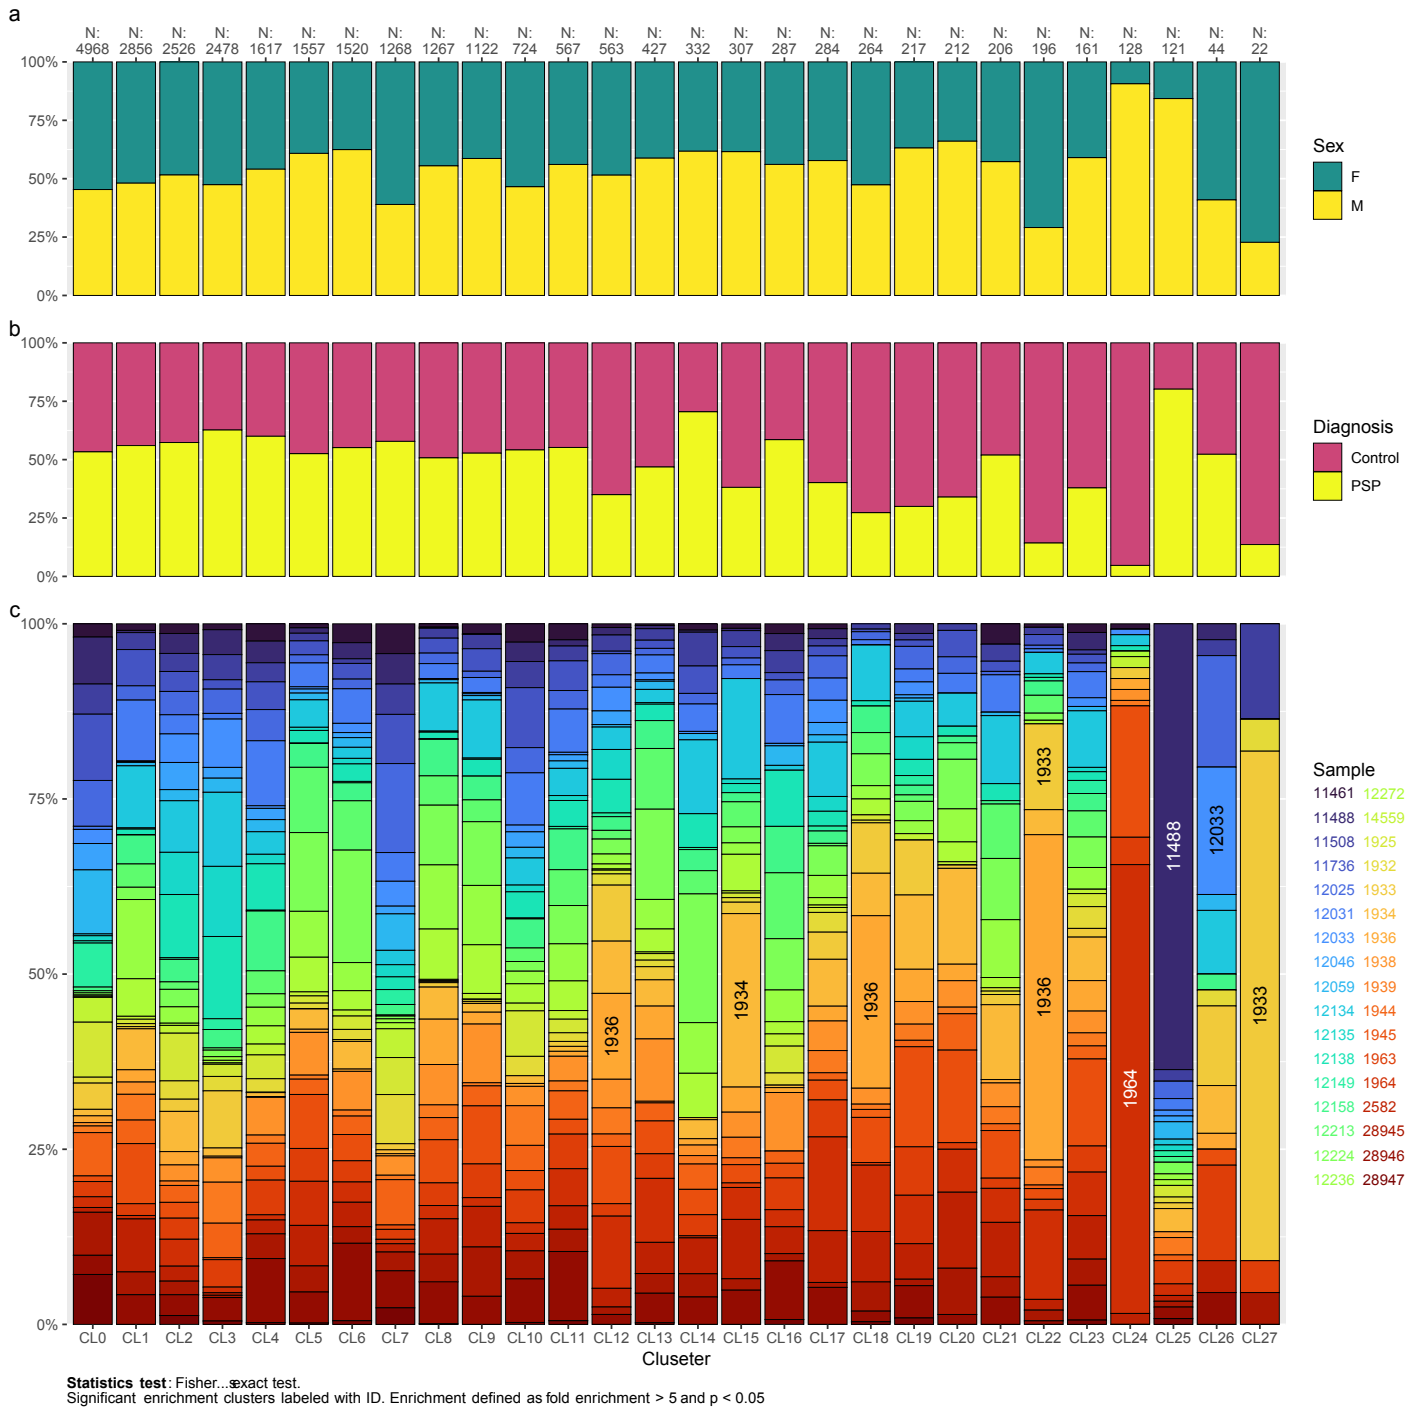

**Figure S11.** Stacked bar plots show the proportion of nuclei from different **a**: sex, **b**: diagnosis, and **c**: sample in each snRNAseq cluster. There was no statistically significant enrichment of nuclei from either sex or diagnosis in any of the clusters. Eight clusters had statistically significant enrichment of nuclei from a small number of samples, depicted with sample numbers on the clusters. All but one of these 8 clusters (CL12) constitute <1% of total nuclei. Statistics: one-sided Fisher Exact test. Source data are provided as a Source Data file.

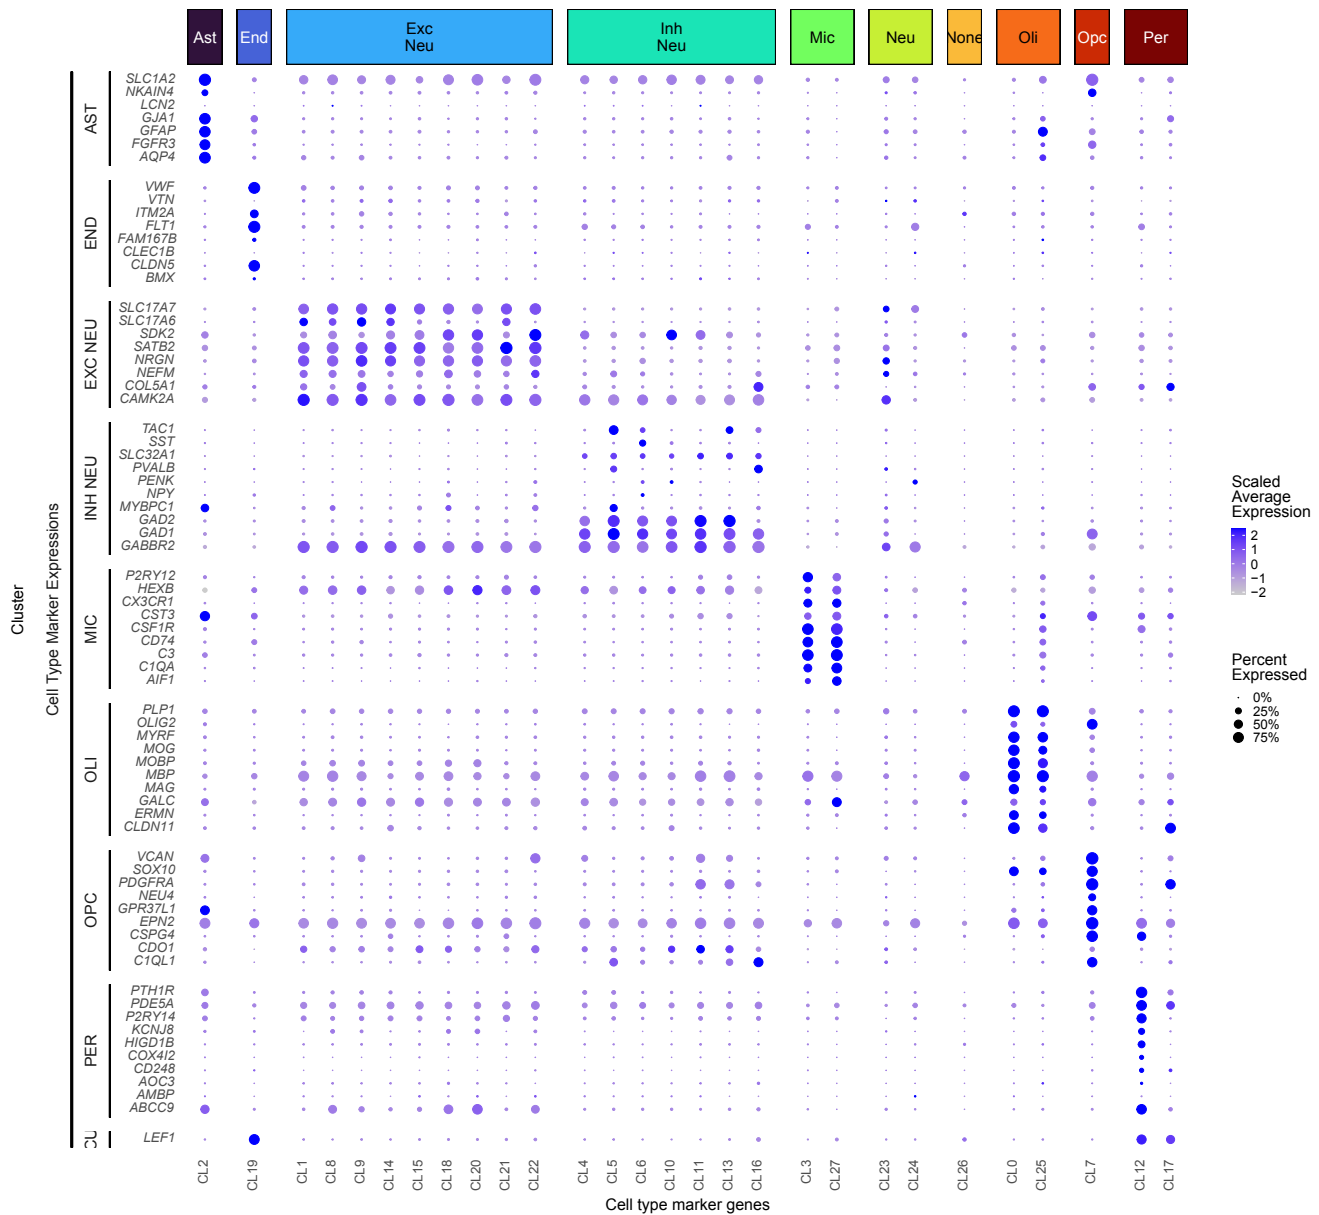

**Figure S12.** Expression of an extended external list<sup>1</sup> of cell-type marker genes in each snRNAseq cluster confirmed our cluster identities. Source data are provided as a Source Data file.



Enrichment of expressed BRETIGEA markers in each clusters

|                |                      | Number of expressed<br>BRETIGEA markers:768 | Number of expressed<br>BRETIGEA markers:827 | Number of expressed<br>BRETIGEA markers:714 | Number of expressed<br>BRETIGEA markers:831 | Number of expressed<br>BRETIGEA markers:764 | Number of expressed<br>BRETIGEA markers:310 |
|----------------|----------------------|---------------------------------------------|---------------------------------------------|---------------------------------------------|---------------------------------------------|---------------------------------------------|---------------------------------------------|
| <b>Ast</b>     | CL2-                 | p=0.0000, FE=14.46529                       | p=0.8647, FE=0.81063                        | p=0.6473, FE=0.93892                        | p=1.0000, FE=0.30733                        | p=0.9821, FE=0.62677                        | p=0.0651, FE=1.54468                        |
| <b>End</b>     | CL19-                | p=0.0160, FE=1.67307                        | p=0.0000, FE=10.50603                       | p=0.0000, FE=2.48517                        | p=0.9995, FE=0.29452                        | p=0.4806, FE=1.04113                        | p=0.0699, FE=1.77638                        |
| <b>Exc Neu</b> | CL22-                | p=0.0000, FE=2.16004                        | p=0.5986, FE=0.96715                        | p=0.9992, FE=0.45638                        | p=0.0000, FE=9.37541                        | p=0.8598, FE=0.81426                        | p=0.0046, FE=1.91119                        |
|                | CL21-                | p=0.0412, FE=1.36312                        | p=0.2213, FE=1.15737                        | p=0.9150, FE=0.75405                        | p=0.0000, FE=8.49451                        | p=0.7262, FE=0.90046                        | p=0.0326, FE=1.64027                        |
|                | CL20-                | p=0.0039, FE=1.52570                        | p=0.9798, FE=0.67623                        | p=0.9919, FE=0.59676                        | p=0.0000, FE=9.29340                        | p=0.7875, FE=0.87141                        | p=0.0071, FE=1.80399                        |
|                | CL18-                | p=0.0000, FE=2.01360                        | p=0.8751, FE=0.80664                        | p=1.0000, FE=0.21234                        | p=0.0000, FE=9.23177                        | p=0.7025, FE=0.91285                        | p=0.0152, FE=1.76066                        |
|                | CL15-                | p=0.1161, FE=1.25607                        | p=0.5740, FE=0.97832                        | p=0.9962, FE=0.52299                        | p=0.0000, FE=9.58631                        | p=0.9342, FE=0.73315                        | p=0.0771, FE=1.50571                        |
|                | CL14-                | p=0.0759, FE=1.29052                        | p=0.3922, FE=1.06149                        | p=0.9978, FE=0.51559                        | p=0.0000, FE=9.95039                        | p=0.9366, FE=0.74130                        | p=0.1371, FE=1.37021                        |
|                | CL9-                 | p=0.0376, FE=1.35389                        | p=0.5433, FE=0.99261                        | p=0.9884, FE=0.61317                        | p=0.0000, FE=9.94416                        | p=0.9999, FE=0.39397                        | p=0.1659, FE=1.32401                        |
|                | CL8-                 | p=0.3585, FE=1.08749                        | p=0.8578, FE=0.81570                        | p=0.9607, FE=0.67485                        | p=0.0000, FE=11.21016                       | p=0.9949, FE=0.54659                        | p=0.3724, FE=1.13985                        |
| CL1-           | p=0.0877, FE=1.26801 | p=0.4944, FE=1.01400                        | p=0.9949, FE=0.56830                        | p=0.0000, FE=9.47269                        | p=0.9610, FE=0.70814                        | p=0.2592, FE=1.22165                        |                                             |
| <b>Inh Neu</b> | CL16-                | p=0.0007, FE=1.78681                        | p=0.6767, FE=0.92185                        | p=0.6923, FE=0.90759                        | p=0.0000, FE=10.91726                       | p=0.8523, FE=0.79830                        | p=0.0177, FE=1.84445                        |
|                | CL13-                | p=0.0000, FE=2.07915                        | p=0.8677, FE=0.80451                        | p=0.9827, FE=0.60569                        | p=0.0000, FE=10.80859                       | p=0.9227, FE=0.74022                        | p=0.0000, FE=3.11202                        |
|                | CL11-                | p=0.0000, FE=1.94363                        | p=0.4774, FE=1.02555                        | p=0.9614, FE=0.66520                        | p=0.0000, FE=11.79829                       | p=0.4888, FE=1.02131                        | p=0.0052, FE=1.96985                        |
|                | CL10-                | p=0.0090, FE=1.62237                        | p=0.9994, FE=0.37666                        | p=0.9997, FE=0.31162                        | p=0.0000, FE=13.01242                       | p=0.9260, FE=0.69894                        | p=0.0110, FE=2.00964                        |
|                | CL6-                 | p=0.0092, FE=1.58919                        | p=0.9986, FE=0.44275                        | p=0.9967, FE=0.45584                        | p=0.0000, FE=12.19033                       | p=0.6962, FE=0.90526                        | p=0.0442, FE=1.70608                        |
| CL5-           | p=0.0041, FE=1.58897 | p=0.9463, FE=0.71786                        | p=0.8191, FE=0.83147                        | p=0.0000, FE=11.19239                       | p=0.9929, FE=0.56121                        | p=0.0001, FE=2.44704                        |                                             |
| CL4-           | p=0.1454, FE=1.26302 | p=0.9999, FE=0.34210                        | p=0.9999, FE=0.28303                        | p=0.0000, FE=12.88862                       | p=0.9996, FE=0.37031                        | p=0.3607, FE=1.17339                        |                                             |
| <b>Mic</b>     | CL27-                | p=0.9897, FE=0.61608                        | p=0.0105, FE=1.44714                        | p=0.0000, FE=10.44679                       | p=1.0000, FE=0.06698                        | p=0.7127, FE=0.91074                        | p=0.0009, FE=2.06496                        |
|                | CL3-                 | p=0.9984, FE=0.51432                        | p=0.9996, FE=0.47763                        | p=0.0000, FE=9.72082                        | p=1.0000, FE=0.06790                        | p=0.0747, FE=1.29253                        | p=0.0000, FE=2.54837                        |
| <b>Neu</b>     | CL24-                | p=0.0008, FE=1.98856                        | p=0.0022, FE=1.84669                        | p=0.3331, FE=1.15175                        | p=0.0000, FE=8.48217                        | p=0.0016, FE=1.92209                        | p=0.0003, FE=2.84221                        |
|                | CL23-                | p=0.9180, FE=0.40559                        | p=0.9325, FE=0.37666                        | p=0.6713, FE=0.87253                        | p=0.0514, FE=2.24906                        | p=0.9169, FE=0.40772                        | p=1.0000, FE=0.00000                        |
| <b>None</b>    | CL26-                | p=0.4899, FE=1.08523                        | p=0.0000, FE=3.22499                        | p=0.0000, FE=9.10502                        | p=0.5598, FE=1.00296                        | p=0.0904, FE=1.74546                        | p=0.2851, FE=1.61315                        |
| <b>Oli</b>     | CL25-                | p=0.0044, FE=3.42775                        | p=1.0000, FE=0.00000                        | p=0.8539, FE=0.52671                        | p=1.0000, FE=0.00000                        | p=0.0000, FE=20.18194                       | p=1.0000, FE=0.00000                        |
|                | CL0-                 | p=0.0505, FE=1.35970                        | p=0.9991, FE=0.47351                        | p=0.8846, FE=0.77697                        | p=1.0000, FE=0.19635                        | p=0.0000, FE=14.13803                       | p=0.0000, FE=3.05275                        |
| <b>Opc</b>     | CL7-                 | p=0.0000, FE=4.65341                        | p=0.9060, FE=0.75736                        | p=0.9739, FE=0.61922                        | p=0.0000, FE=2.61584                        | p=0.0000, FE=3.95441                        | p=0.0000, FE=9.86455                        |
| <b>Per</b>     | CL17-                | p=0.0000, FE=3.40698                        | p=0.0000, FE=7.79679                        | p=0.2371, FE=1.30880                        | p=0.8823, FE=0.67472                        | p=0.0691, FE=1.59009                        | p=0.4242, FE=1.20579                        |
|                | CL12-                | p=0.0001, FE=2.06428                        | p=0.0000, FE=7.11150                        | p=0.0254, FE=1.57577                        | p=0.9828, FE=0.55387                        | p=0.4255, FE=1.07101                        | p=0.0085, FE=2.14462                        |

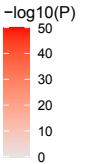

**Figure S13.** Enrichment of BRETIGEA<sup>2</sup> cell-type marker genes in each cluster corresponds to the cluster type. BRETIGEA cell-types for each column are shown at the bottom and number of BRETIGEA genes for these cell-types expressed in our snRNAseq data is shown at the top. P value and fold enrichment of these BRETIGEA cell-type marker genes for each cluster are shown in the data cells. Statistics: one-sided Fisher Exact test. Source data are provided as a Source Data file.

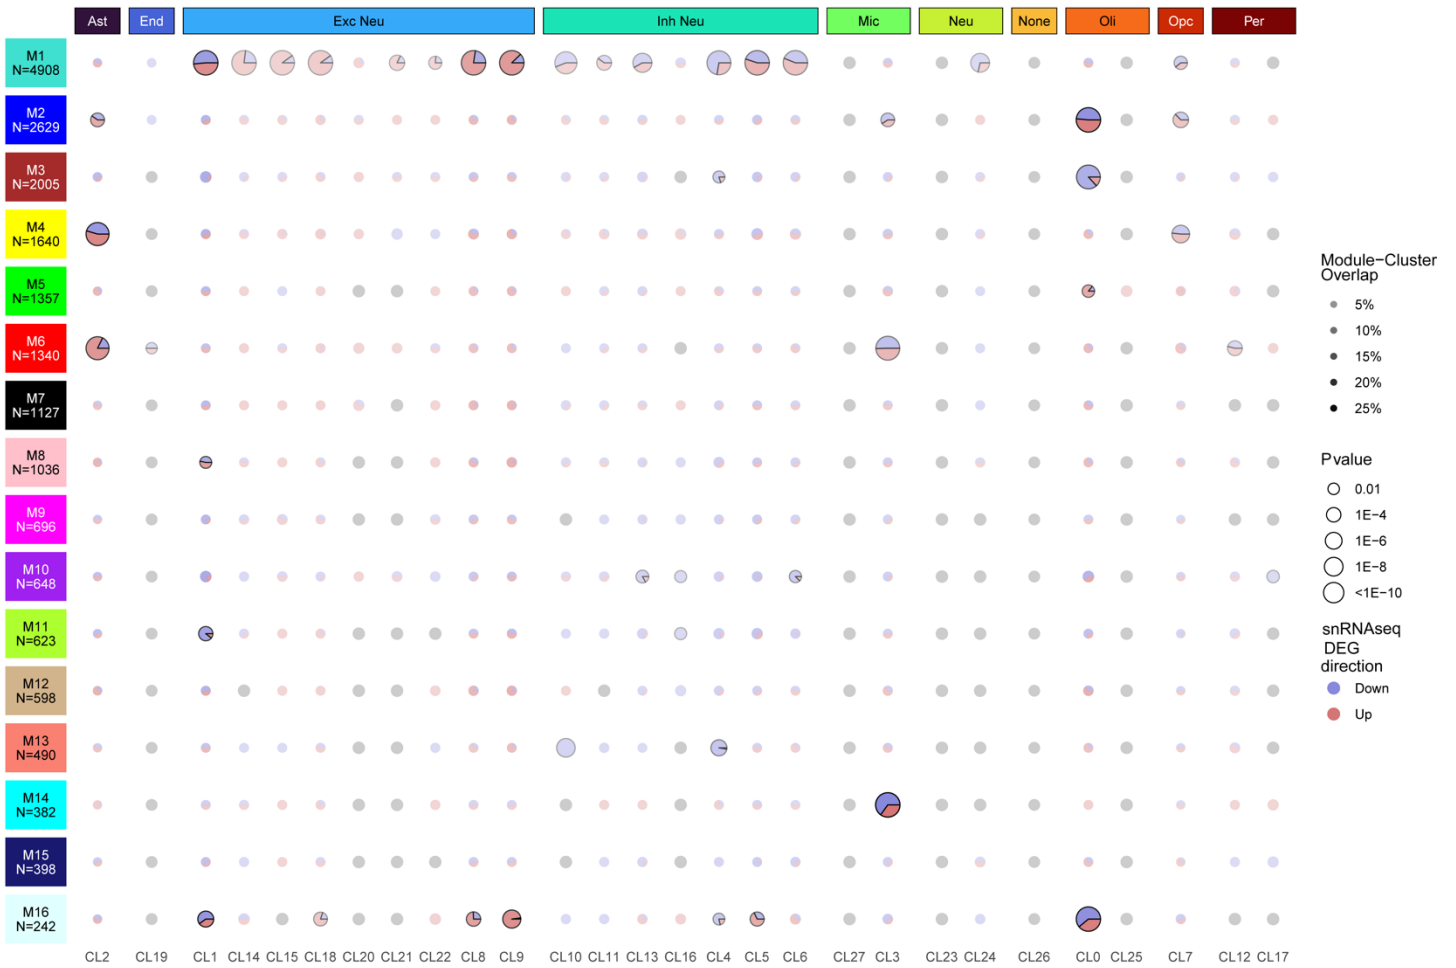

**Figure S14.** Overlap of WGCNA module genes and snRNASeq DEG genes. The number of overlapping genes between snRNASeq DEGs in each cluster and the 16 WGCNA modules. P value: Fisher's exact test for the enrichment of snRNASeq DEGs in the expression module. Pie chart demonstrates proportion of up- and down-regulated genes. The radii of the pie charts reflect the significance of the overlap, where significant overlaps ( $p < 0.05$ ) have solid outline. Transparency of pie chart reflects the size of the overlap between module genes and cluster DEGs (more opaque=higher number of overlapping genes). Statistics: one-sided Fisher Exact test. Source data are provided as a Source Data file.

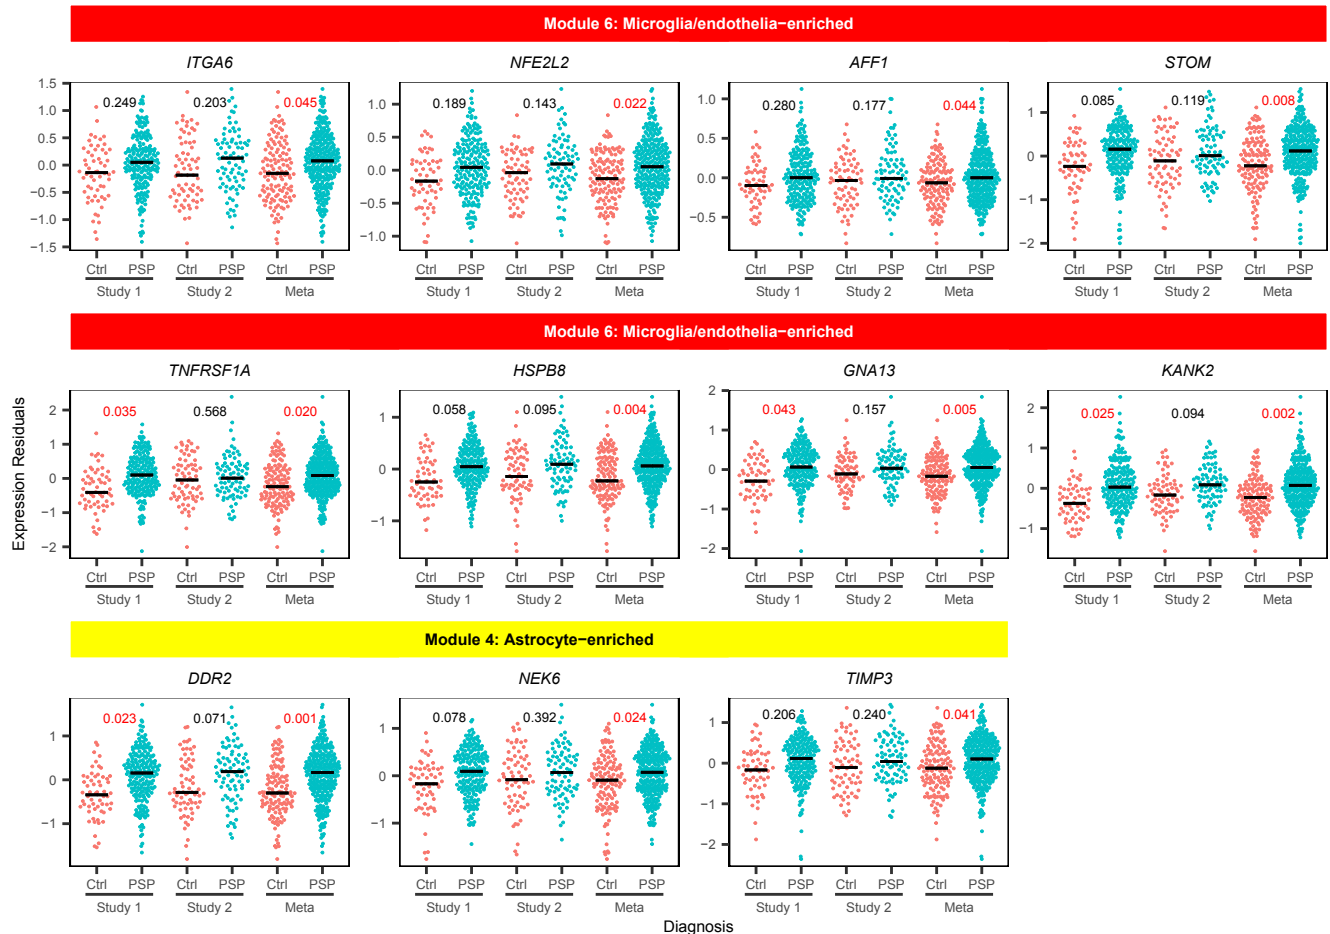

**Figure S15.** Expression level of the Drosophila tau model screened genes between PSP and control in bulk RNAseq. Statistics: differential expression analysis using linear regression adjusting for covariates. FDR-adjusted p values are presented. Unadjusted p values are provided in Supplementary Data 1 and source data. Study 1: N = 257 PSP and Control individuals; Study 2: N = 151 PSP and Control individuals; Meta: N = 408 PSP and Control individuals. Red text indicates up-regulation in PSP. Blue text indicates down-regulation in PSP.

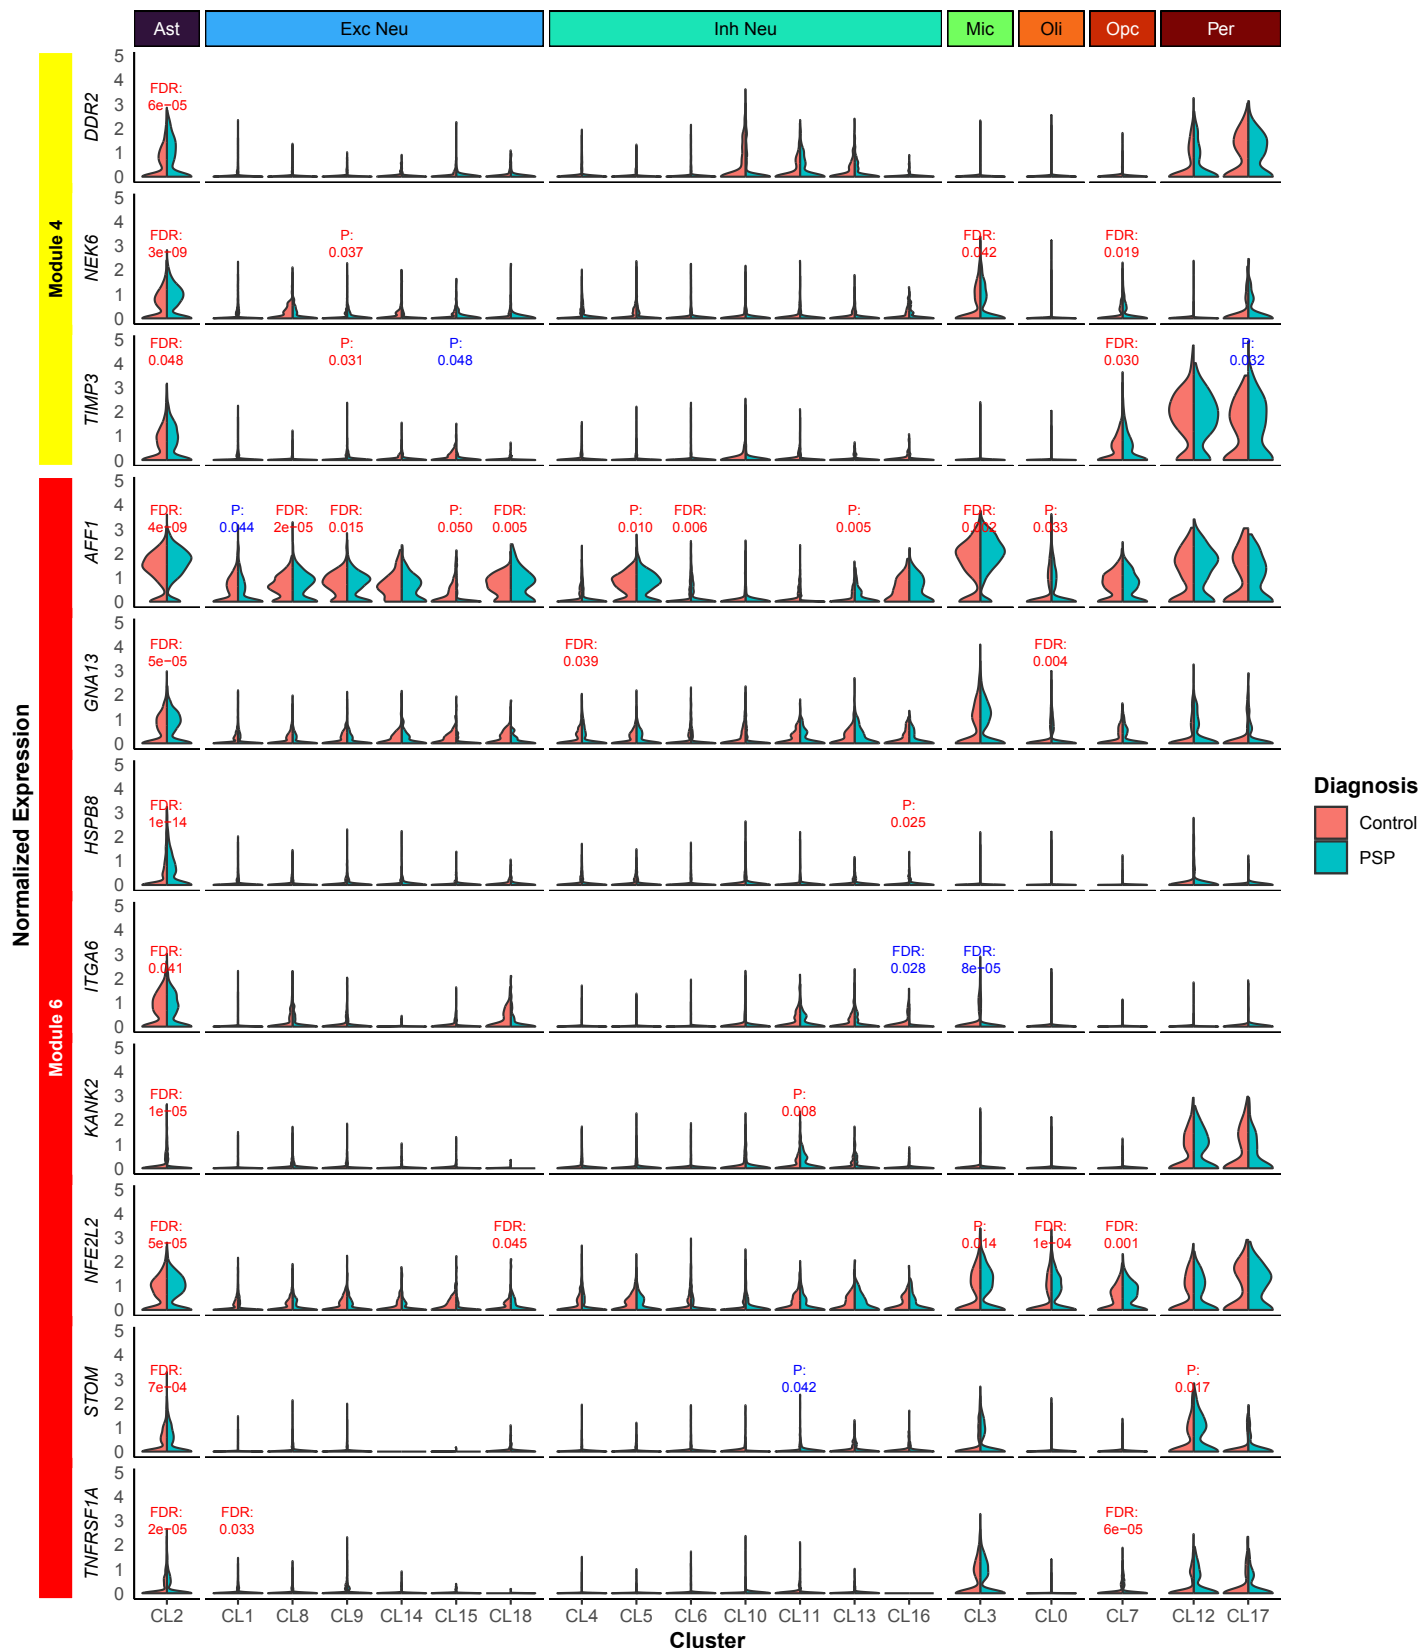

**Figure S16.** Expression levels of the Drosophila tau model screened genes between PSP and control in snRNAseq. Statistics: Zero-inflated generalized linear regression comparing PSP vs Control. nuclei adjusting for sex and age, implemented by the MAST package. Significance: FDR-adjusted (FDR) or unadjusted (P) p values as indicated. Red FDR/p indicates up-regulation in PSP. Blue FDR/p indicates

down-regulation in PSP. Expression changes with unadjusted p values greater than 0.05 were not annotated for clarity.

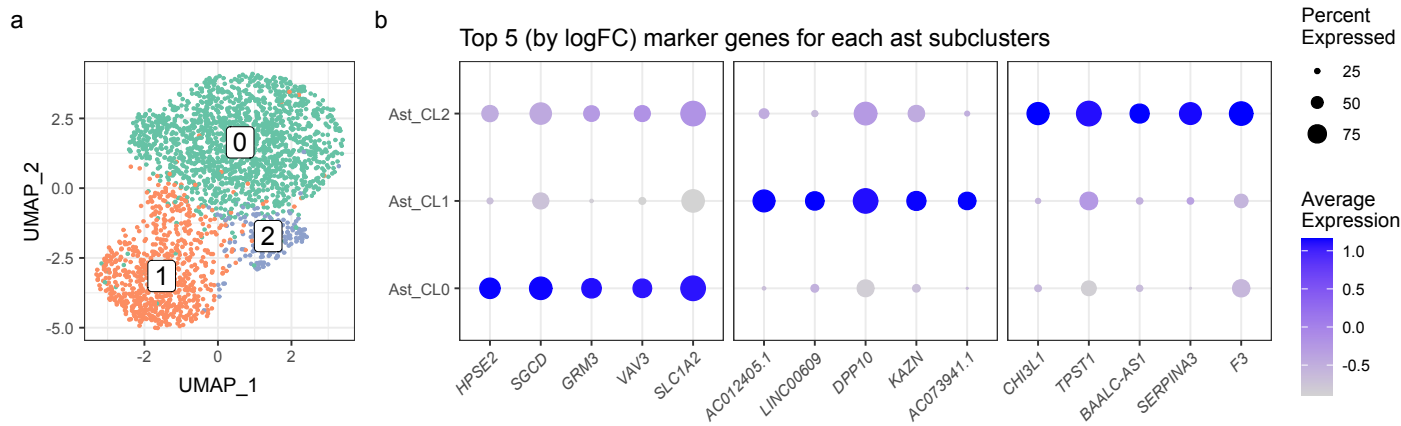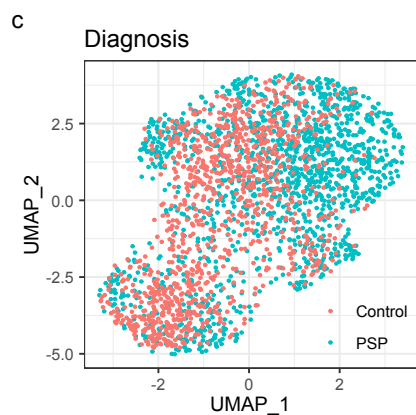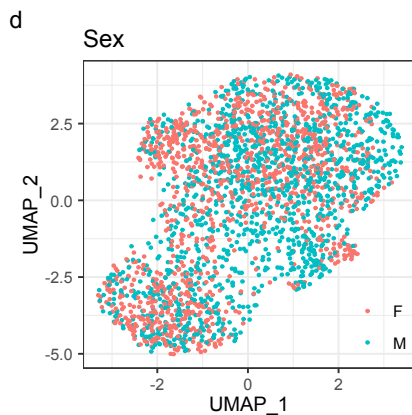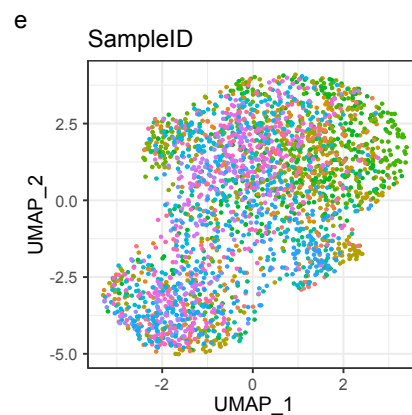

**f** Up DE

**g** Down DE

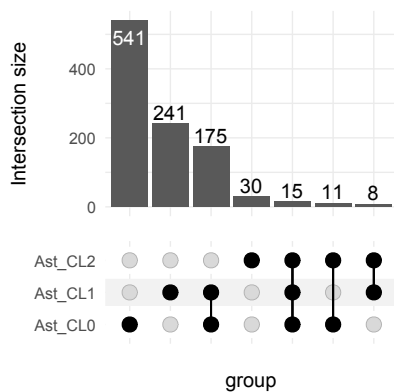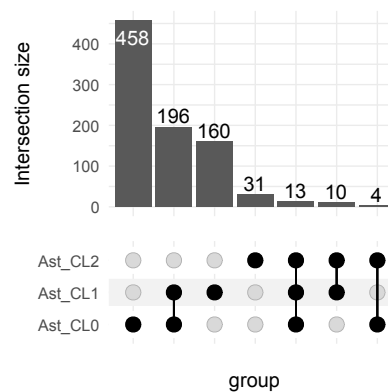

**h**

| GeneName     | subcluster | PSPvsCtrl |         |        | Control |         | PSP     |         |
|--------------|------------|-----------|---------|--------|---------|---------|---------|---------|
|              |            | logFC     | pvalue  | FDR    | avg_exp | pct_exp | avg_exp | pct_exp |
| <i>DDR2</i>  | Ast_CL0    | 0.0869    | 0.09324 | 0.2708 | 0.6963  | 58.73%  | 1.09721 | 59.12%  |
|              | Ast_CL1    | 0.2124    | 0.00021 | 0.0051 | 0.7960  | 46.34%  | 1.09811 | 60.42%  |
|              | Ast_CL2    | -0.0262   | 0.46701 | 0.8701 | 0.8575  | 64.06%  | 0.84830 | 70.34%  |
| <i>KANK2</i> | Ast_CL0    | 0.0343    | 0.00401 | 0.0277 | 0.2504  | 25.09%  | 0.32264 | 26.17%  |
|              | Ast_CL1    | 0.0281    | 0.00270 | 0.0330 | 0.2060  | 15.30%  | 0.30969 | 27.56%  |
|              | Ast_CL2    | 0.0771    | 0.46194 | 0.8683 | 0.2039  | 26.56%  | 0.26378 | 38.98%  |
| <i>STOM</i>  | Ast_CL0    | 0.0614    | 0.02658 | 0.1138 | 0.5195  | 55.27%  | 0.57767 | 48.23%  |
|              | Ast_CL1    | 0.0995    | 0.01504 | 0.1064 | 0.4368  | 35.34%  | 0.61523 | 54.42%  |
|              | Ast_CL2    | 0.2406    | 0.01463 | 0.2901 | 0.4465  | 53.12%  | 0.76158 | 75.42%  |

**Figure S17.** Subclustering analysis of the astrocyte nuclei. **a:** UMAP projection of the nuclei and the subcluster assignment. **b:** Top 5 marker genes for each subcluster. **c-e:** UMAP projection of the nuclei colored by key covariates. **f-g:** The number of significant PSP vs Control DEGs in each cluster and their overlaps. Interestingly, there are many overlaps between the DEGs in Ast\_CL0 and Ast\_CL1 in both directions. **h:** PSP vs Control DEG statistics for *DDR2*, *KANK2*, and *STOM*. Source data are provided as a Source Data file.

logFC of sn-validated genes

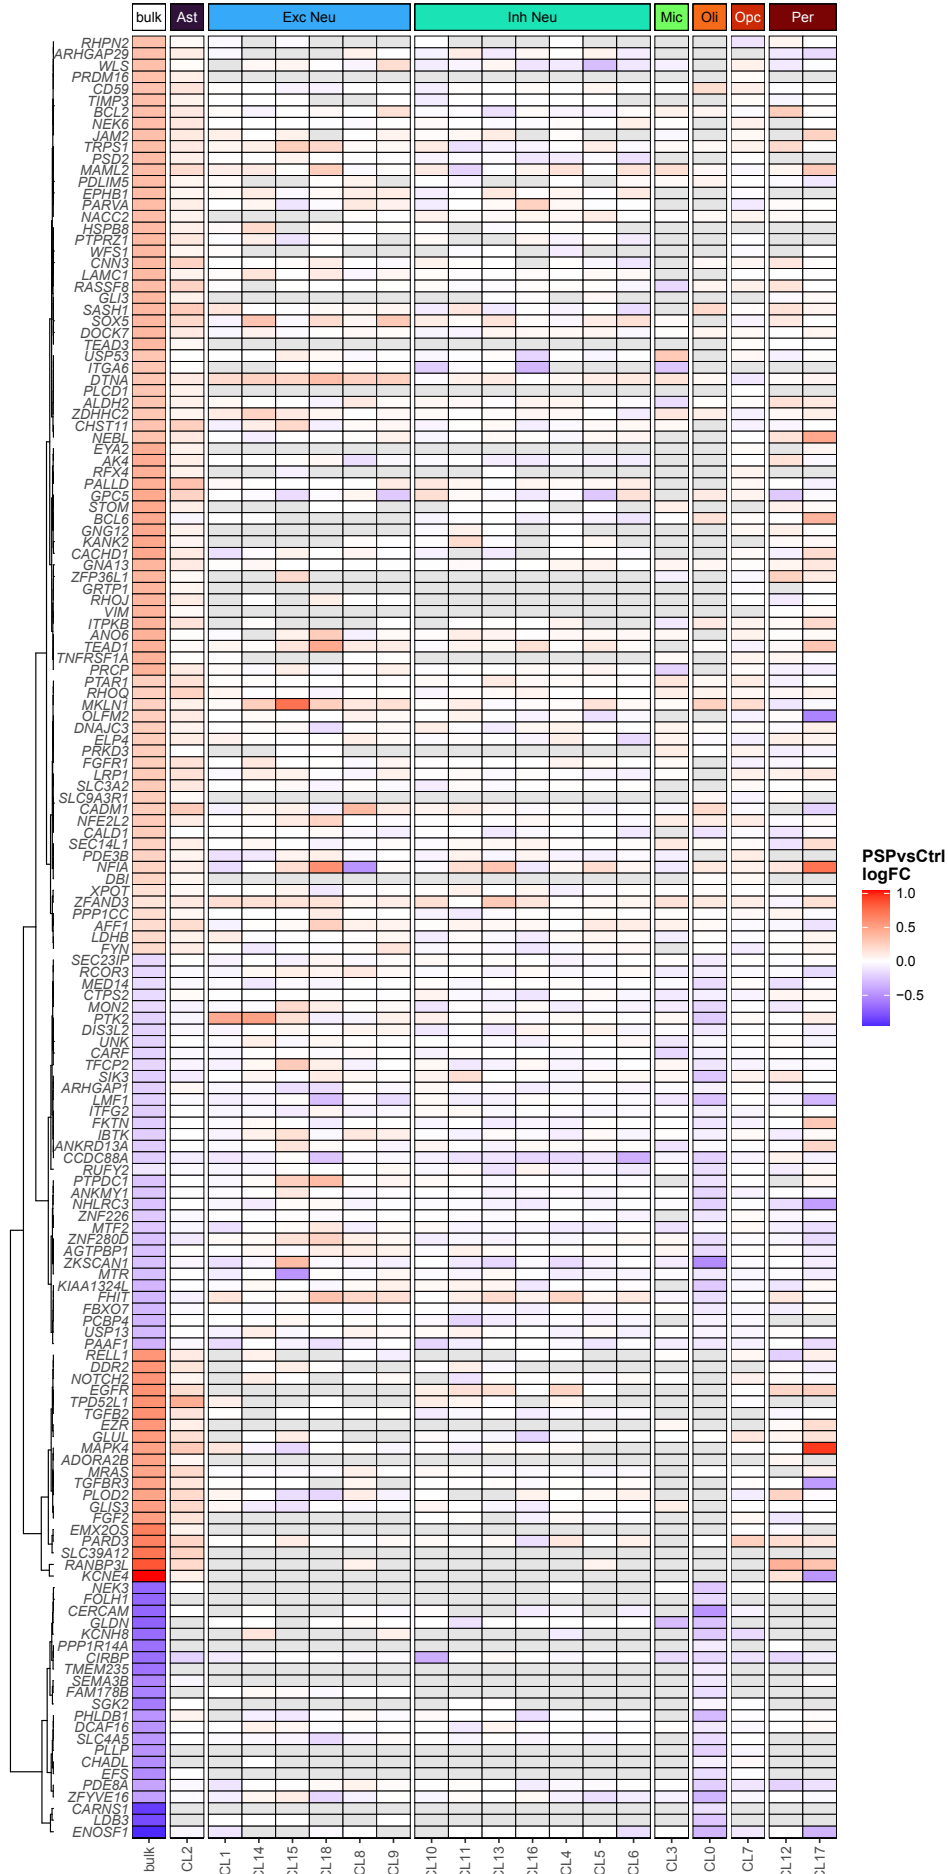



**Figure S18.** Bulk RNAseq log fold change of the 155 sn-validated genes. Source data are provided as a Source Data file.

## Example Gating Strategy for Nuclei Isolation

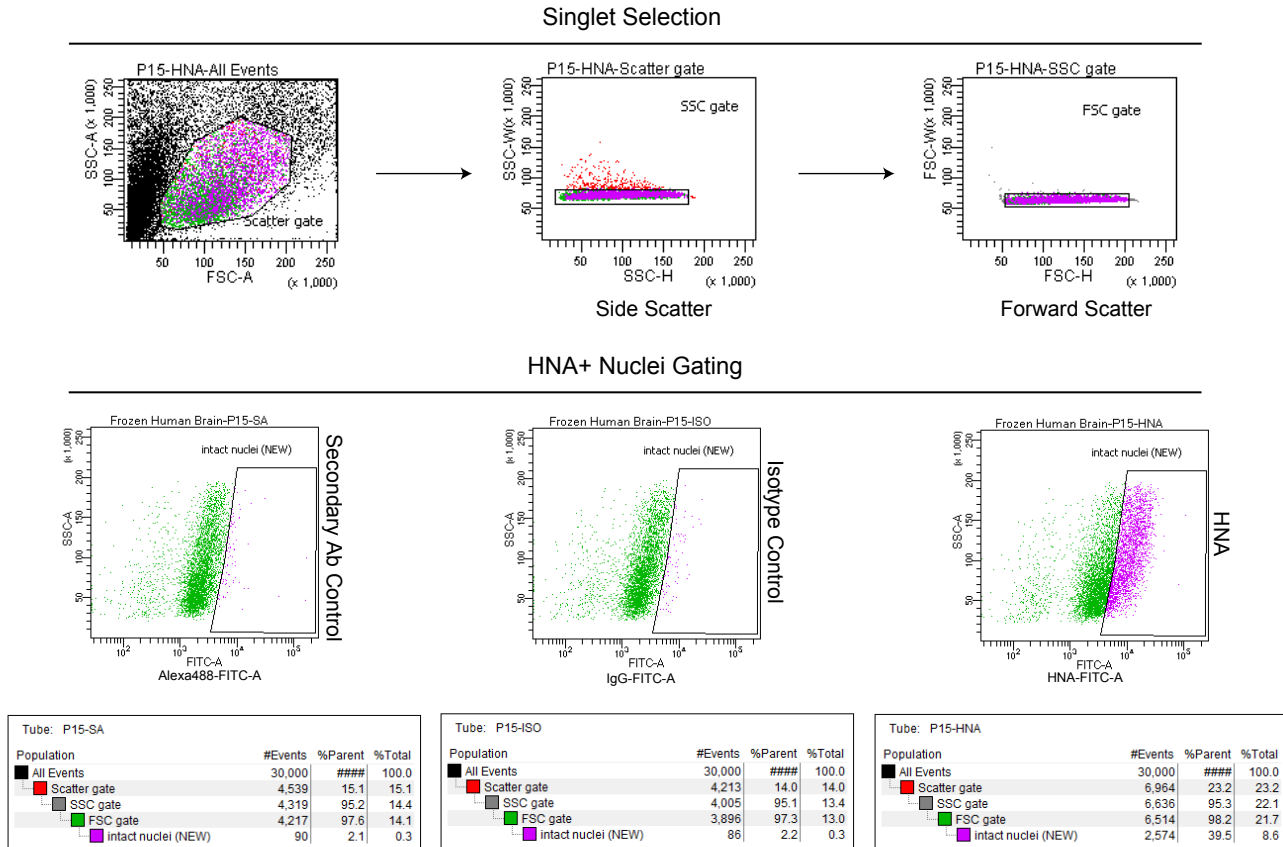

**Figure S19. Gating strategy to obtain intact nuclei from PSP and control brain samples.** Example flow plots showing the isolation of nuclei from PSP sample 12031. Statistics shows the number and percent of events within the gate.

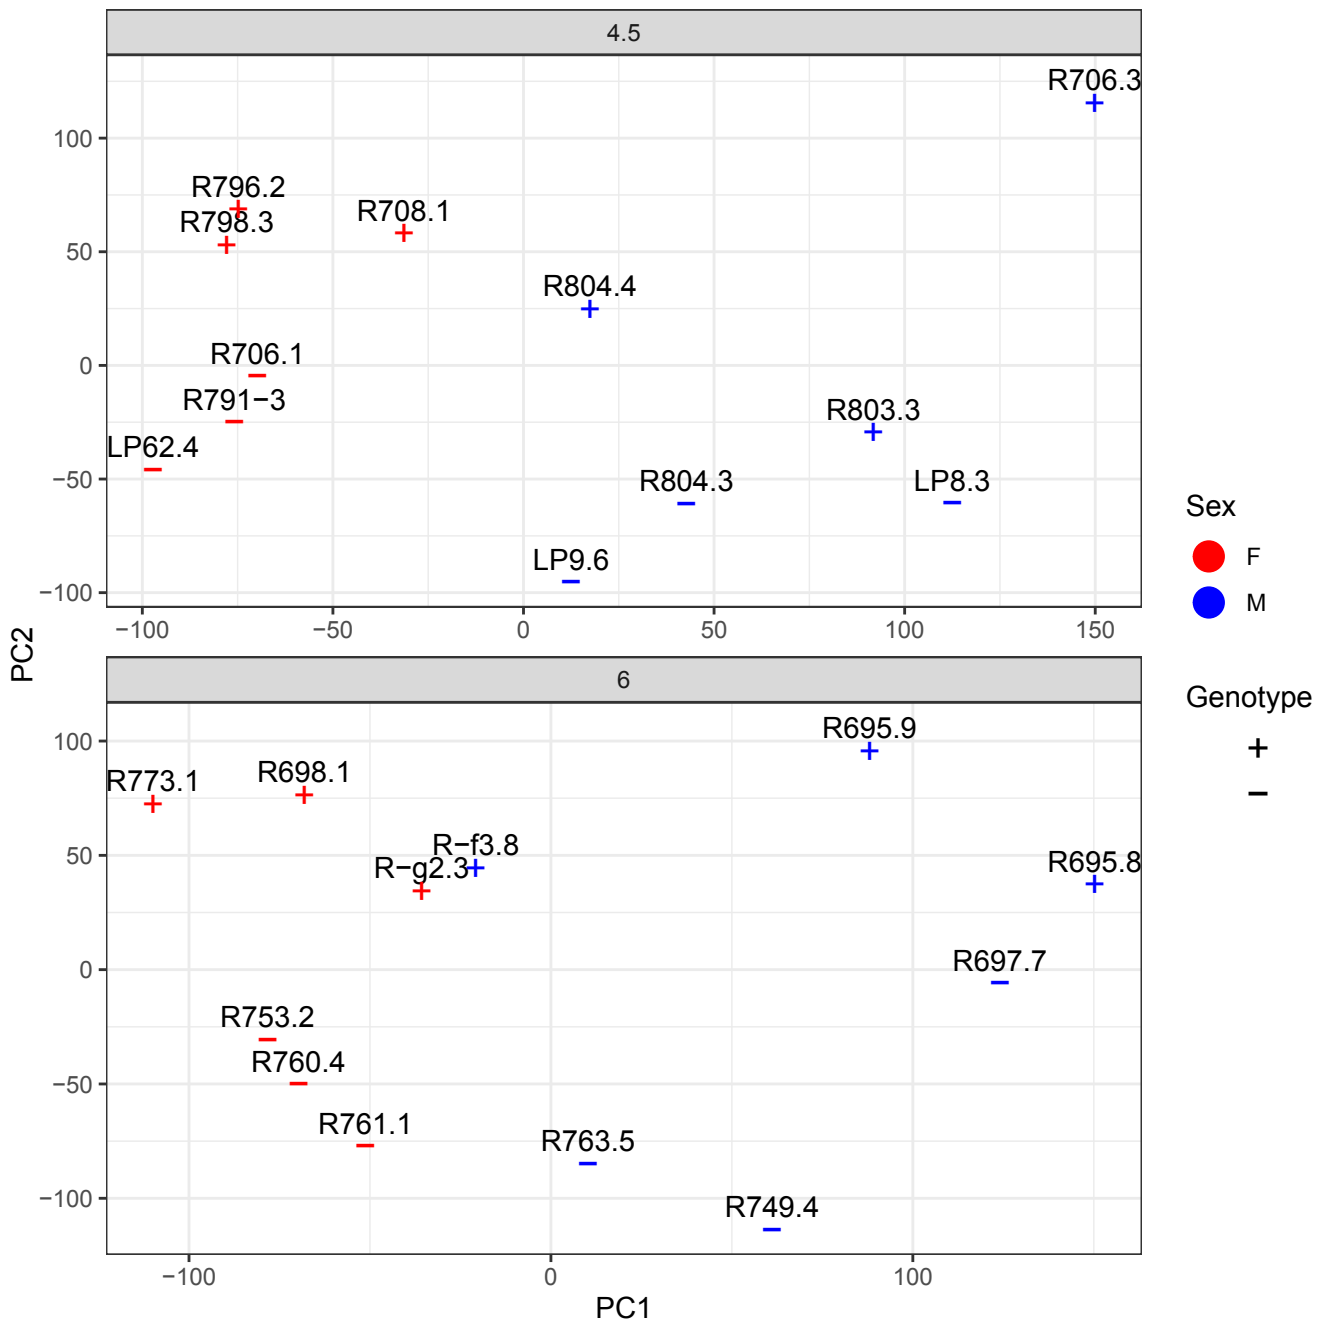

**Figure S20:** Principal component analysis (PCA) of the mouse expression data. No outlier is detected. Genotype + = rTg4510 mice, - = non-transgenic littermates.

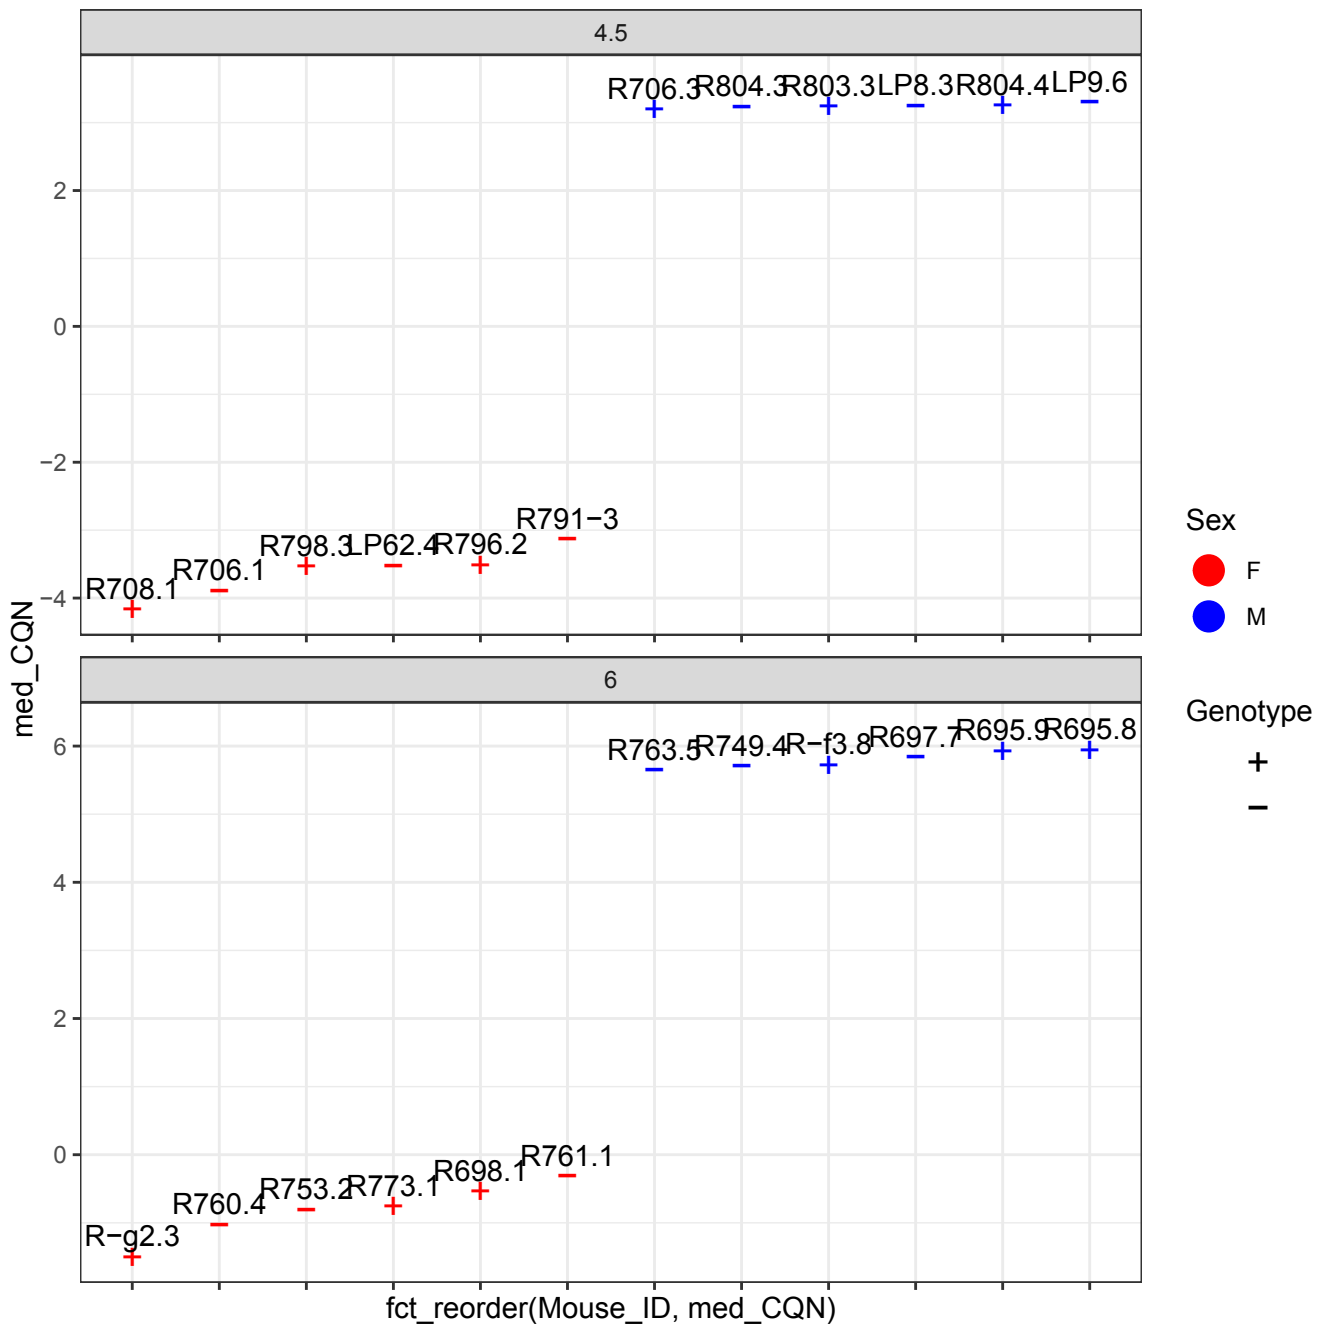

**Figure S21:** Expression of chromosome Y genes *Ddx3y*, and *Kdm5d* as sex check for the mouse sample. Genotype + = rTg4510 mice, - = non-transgenic littermates.

|               | Study 1                   |                           |                               |                      | Study 2                   |                          |                               |                      |
|---------------|---------------------------|---------------------------|-------------------------------|----------------------|---------------------------|--------------------------|-------------------------------|----------------------|
|               | Ctrl, N = 58 <sup>1</sup> | PSP, N = 199 <sup>1</sup> | Overall, N = 257 <sup>1</sup> | p-value <sup>2</sup> | Ctrl, N = 69 <sup>1</sup> | PSP, N = 82 <sup>1</sup> | Overall, N = 151 <sup>1</sup> | p-value <sup>2</sup> |
| <b>Sex</b>    |                           |                           |                               | 0.856                |                           |                          |                               | 0.266                |
| Female        | 34 (59%)                  | 114 (57%)                 | 148 (58%)                     |                      | 34 (49%)                  | 33 (40%)                 | 67 (44%)                      |                      |
| Male          | 24 (41%)                  | 85 (43%)                  | 109 (42%)                     |                      | 35 (51%)                  | 49 (60%)                 | 84 (56%)                      |                      |
| <b>Age</b>    | 84 (79, 92)               | 78 (71, 83)               | 79 (73, 84)                   | 2e-06                | 86 (78, 89)               | 74 (69, 79)              | 78 (72, 85)                   | 3e-10                |
| <b>RIN</b>    | 8.80 (8.00, 9.20)         | 8.10 (7.30, 8.90)         | 8.30 (7.50, 9.00)             | 0.002                | 7.90 (7.10, 8.50)         | 8.40 (8.10, 8.80)        | 8.30 (7.90, 8.65)             | 2e-06                |
| <b>Source</b> |                           |                           |                               | 2e-36                |                           |                          |                               | 2e-20                |
| Banner        | 0 (0%)                    | 0 (0%)                    | 0 (0%)                        |                      | 44 (64%)                  | 0 (0%)                   | 44 (29%)                      |                      |
| Mayo          | 15 (26%)                  | 199 (100%)                | 214 (83%)                     |                      | 25 (36%)                  | 82 (100%)                | 107 (71%)                     |                      |
| UKY           | 43 (74%)                  | 0 (0%)                    | 43 (17%)                      |                      | 0 (0%)                    | 0 (0%)                   | 0 (0%)                        |                      |

<sup>1</sup>n (%); Median (IQR)

<sup>2</sup>Pearson's Chi-squared test; Wilcoxon rank sum test; Fisher's exact test

**Table S1.** Demographic information for the bulk RNAseq. Statistical tests are two-sided.

| <b>N = 22,560<sup>1</sup></b> |              |
|-------------------------------|--------------|
| Gene Type                     |              |
| protein_coding                | 15,151 (67%) |
| antisense                     | 2,717 (12%)  |
| pseudogene                    | 1,889 (8.4%) |
| lincRNA                       | 1,619 (7.2%) |
| processed_transcript          | 327 (1.4%)   |
| less than 1%                  | 857 (3.8%)   |

<sup>1</sup>n (%)

**Table S2.** Type of detected genes. Source data are provided as a Source Data file.

| DEG Direction | GeneName         | GWAS SNP                                   |
|---------------|------------------|--------------------------------------------|
| Down in PSP   | AARSD1           | rs8070723(MAPT),<br>rs242557(MAPT)         |
|               | ASB16            |                                            |
|               | ASB16-AS1        |                                            |
|               | MOBP             | rs10675541(MOBP),<br>rs1768208(MOBP)       |
|               | PTGES3L          | rs8070723(MAPT),<br>rs242557(MAPT)         |
|               | PTGES3L-AARSD1   |                                            |
|               | RP5-882C2.2      |                                            |
|               | TMEM106A         |                                            |
|               | ACBD4            | rs71920662(MAPT)                           |
|               | ARHGAP27         |                                            |
|               | ATP5G2           | rs147124286(SP1)                           |
|               | DND1P1           | rs71920662(MAPT)                           |
|               | FAM49B           | rs2045091(ASAP1)                           |
|               | KANSL1-AS1       | rs71920662(MAPT)                           |
|               | LRRC37A          |                                            |
|               | MAP3K14-AS1      |                                            |
|               | RP11-259G18.3    |                                            |
|               | RP11-351D16.3    | rs2142991(BMS1)                            |
|               | RP11-707O23.5    | rs71920662(MAPT)                           |
|               | TENC1            | rs147124286(SP1)                           |
| ZNF37BP       | rs2142991(BMS1)  |                                            |
| Up in PSP     | COASY            | rs8070723(MAPT),<br>rs242557(MAPT)         |
|               | CTD-3199J23.4    |                                            |
|               | ETV4             |                                            |
|               | KCNJ8            | rs7966334(SLCO1A2),<br>rs11568563(SLCO1A2) |
|               | LDHB             |                                            |
|               | MYRIP            | rs10675541(MOBP),<br>rs1768208(MOBP)       |
|               | PSME3            | rs8070723(MAPT),<br>rs242557(MAPT)         |
|               | RND2             |                                            |
|               | RP11-284H19.1    | rs7966334(SLCO1A2),<br>rs11568563(SLCO1A2) |
|               | RP11-424C20.2    |                                            |
|               | RP11-59N23.1     |                                            |
|               | RP11-729I10.2    |                                            |
|               | Y_RNA            | rs8070723(MAPT),<br>rs242557(MAPT)         |
|               | ADCY8            | rs2045091(ASAP1)                           |
|               | CBX5             | rs147124286(SP1)                           |
|               | HEXIM1           | rs71920662(MAPT)                           |
|               | IARS2            | rs6687758(None)                            |
|               | MORF4L1P1        |                                            |
| RP11-33M22.2  | rs57113693(STX6) |                                            |
| RP11-737F9.1  | rs2045091(ASAP1) |                                            |
| RP11-793H13.8 | rs147124286(SP1) |                                            |

**Table S3.** PSP DEGs that are within 1Mbp of PSP GWAS loci.

|               | <b>Control, N = 16<sup>1</sup></b> | <b>PSP, N = 18<sup>1</sup></b> | <b>Overall, N = 34<sup>1</sup></b> | <b>p-value<sup>2</sup></b> |
|---------------|------------------------------------|--------------------------------|------------------------------------|----------------------------|
| <b>RIN</b>    | 7.85 (6.47, 8.22)                  | 7.55 (6.90, 7.80)              | 7.70 (6.73, 8.17)                  | 0.972                      |
| <b>Sex</b>    |                                    |                                |                                    | 0.492                      |
| Female        | 9 (56%)                            | 8 (44%)                        | 17 (50%)                           |                            |
| Male          | 7 (44%)                            | 10 (56%)                       | 17 (50%)                           |                            |
| <b>Age</b>    | 90 (87, 93)                        | 86 (82, 91)                    | 89 (83, 92)                        | 0.104                      |
| <b>Source</b> |                                    |                                |                                    |                            |
| Mayo          | 16 (100%)                          | 18 (100%)                      | 34 (100%)                          |                            |

<sup>1</sup>Median (IQR); n (%)

<sup>2</sup>Wilcoxon rank sum test; Pearson's Chi-squared test

**Table S4.** Demographic information for the snRNAseq. Statistical tests are two-sided.



| <b>Cell Type</b>  | <b>Cluster</b> | <b>Up</b> | <b>Down</b> | <b>N.S.</b> |
|-------------------|----------------|-----------|-------------|-------------|
| Astrocyte         | CL2            | 1,477     | 1,121       | 28,240      |
| Endothelia        | CL19           | 1         | 4           | 30,833      |
| Excitatory neuron | CL22           | 34        | 14          | 30,790      |
|                   | CL21           | 23        | 14          | 30,801      |
|                   | CL20           | 20        | 5           | 30,813      |
|                   | CL18           | 282       | 78          | 30,478      |
|                   | CL15           | 99        | 21          | 30,718      |
|                   | CL14           | 104       | 71          | 30,663      |
|                   | CL9            | 1,946     | 534         | 28,358      |
|                   | CL8            | 1,451     | 725         | 28,662      |
|                   | CL1            | 1,354     | 2,260       | 27,224      |
| Inhibitory neuron | CL16           | 12        | 19          | 30,807      |
|                   | CL13           | 133       | 260         | 30,445      |
|                   | CL11           | 47        | 41          | 30,750      |
|                   | CL10           | 40        | 60          | 30,738      |
|                   | CL6            | 403       | 484         | 29,951      |
|                   | CL5            | 658       | 996         | 29,184      |
|                   | CL4            | 270       | 638         | 29,930      |
| Microglia         | CL27           | 0         | 0           | 30,838      |
|                   | CL3            | 537       | 659         | 29,642      |
| Neuron            | CL24           | 22        | 37          | 30,779      |
|                   | CL23           | 0         | 0           | 30,838      |
| None              | CL26           | 0         | 0           | 30,838      |
| Oligodendrocyte   | CL25           | 1         | 0           | 30,837      |
|                   | CL0            | 1,293     | 1,242       | 28,303      |
| OPC               | CL7            | 440       | 412         | 29,986      |
| Pericyte          | CL17           | 5         | 4           | 30,829      |
|                   | CL12           | 44        | 35          | 30,759      |

**Table S5.** Number of DEG (PSP vs Ctrl) in each snRNAseq cluster.

|                     | <b>Control, N = 12<sup>1</sup></b> | <b>Transgenic, N = 12<sup>1</sup></b> | <b>Overall, N = 24<sup>1</sup></b> | <b>p-value<sup>2</sup></b> |
|---------------------|------------------------------------|---------------------------------------|------------------------------------|----------------------------|
| <b>RIN</b>          | 7.20 (6.90, 7.50)                  | 7.20 (7.07, 7.62)                     | 7.20 (7.07, 7.53)                  | 0.663                      |
| <b>Sex</b>          |                                    |                                       |                                    | 1.000                      |
| Female              | 6 (50%)                            | 6 (50%)                               | 12 (50%)                           |                            |
| Male                | 6 (50%)                            | 6 (50%)                               | 12 (50%)                           |                            |
| <b>Age (months)</b> |                                    |                                       |                                    | 1.000                      |
| 4.5                 | 6 (50%)                            | 6 (50%)                               | 12 (50%)                           |                            |
| 6                   | 6 (50%)                            | 6 (50%)                               | 12 (50%)                           |                            |

<sup>1</sup>Median (IQR); n (%)

<sup>2</sup>Wilcoxon rank sum test; Pearson's Chi-squared test

**Table S6.** Mouse demographic information. Statistical tests are two-sided.

| Gene         | Study   | Simple |        |       | Comprehensive |        |       |
|--------------|---------|--------|--------|-------|---------------|--------|-------|
|              |         | logFC  | pvalue | FDR   | logFC         | pvalue | FDR   |
| <i>DDR2</i>  | study 1 | 0.539  | 9e-04  | 0.023 | 0.208         | 5e-05  | 3e-04 |
|              | study 2 | 0.599  | 0.005  | 0.071 | 0.226         | 0.002  | 0.010 |
|              | meta    | 0.561  | 1e-05  | 0.001 | 0.213         | 2e-07  | 3e-06 |
| <i>STOM</i>  | study 1 | 0.431  | 0.010  | 0.085 | 0.137         | 0.008  | 0.022 |
|              | study 2 | 0.507  | 0.015  | 0.119 | 0.124         | 0.061  | 0.131 |
|              | meta    | 0.461  | 4e-04  | 0.008 | 0.132         | 0.001  | 0.004 |
| <i>KANK2</i> | study 1 | 0.523  | 0.001  | 0.025 | 0.341         | 2e-07  | 3e-06 |
|              | study 2 | 0.416  | 0.009  | 0.094 | 0.304         | 1e-04  | 0.001 |
|              | meta    | 0.469  | 3e-05  | 0.002 | 0.326         | 3e-11  | 1e-09 |

**Table S7.** PSP vs Control DEG statistics for the top 3 candidate genes in the Simple model (not adjusting for cell proportion) and the Comprehensive model (adjusting for cell proportion). Statistics: Linear regression compares PSP and control gene expression adjusting for covariates. Study 1: N = 257 PSP and Control individuals; Study 2: N = 151 PSP and Control individuals; Meta: N = 408 PSP and Control individuals. FDR-corrected p values are also provided.

| Gene         | Cell | Cluster | MAST  |        |       | Pseudobulk |        |       |
|--------------|------|---------|-------|--------|-------|------------|--------|-------|
|              |      |         | logFC | pvalue | FDR   | logFC      | pvalue | FDR   |
| <i>DDR2</i>  | oli  | CL0     | NA    | NA     | NA    | 0.111      | 0.763  | 0.936 |
|              | ast  | CL2     | 0.139 | 6e-06  | 6e-05 | 0.361      | 0.089  | 0.498 |
|              | mic  | CL3     | NA    | NA     | NA    | -0.070     | 0.919  | 1.000 |
|              | opc  | CL7     | NA    | NA     | NA    | -0.136     | 0.749  | 0.970 |
|              | per  | CL12    | 0.018 | 0.774  | 0.968 | -0.077     | 0.743  | 0.969 |
| CL17         |      | -0.077  | 0.409 | 1.000  |       |            |        |       |
| <i>KANK2</i> | oli  | CL0     | NA    | NA     | NA    | 1.159      | 0.007  | 0.160 |
|              | ast  | CL2     | 0.047 | 1e-06  | 1e-05 | 0.726      | 0.013  | 0.236 |
|              | mic  | CL3     | NA    | NA     | NA    | 0.023      | 0.962  | 1.000 |
|              | opc  | CL7     | NA    | NA     | NA    | 0.371      | 0.497  | 0.912 |
|              | per  | CL12    | 0.033 | 0.855  | 0.984 | -0.241     | 0.333  | 0.864 |
| CL17         |      | 0.036   | 0.090 | 0.886  |       |            |        |       |
| <i>STOM</i>  | oli  | CL0     | NA    | NA     | NA    | 1.221      | 0.003  | 0.107 |
|              | ast  | CL2     | 0.087 | 1e-04  | 7e-04 | 0.435      | 0.010  | 0.208 |
|              | mic  | CL3     | 0.084 | 0.081  | 0.201 | 0.509      | 0.018  | 0.497 |
|              | opc  | CL7     | NA    | NA     | NA    | 0.194      | 0.691  | 0.963 |
|              | per  | CL12    | 0.081 | 0.017  | 0.302 | 0.538      | 0.033  | 0.634 |
| CL17         |      | 0.028   | 0.757 | 1.000  |       |            |        |       |

**Table S8.** PSP vs Control DE results using MAST in each cluster and pseudobulk in each cell type for the top nominated genes. Statistics: MAST: Zero-inflated regression comparing PSP vs Control nuclei adjusting for sex and age, implemented by the MAST package. Pseudobulk: Negative binomial generalized linear model comparing aggregated gene count between PSP vs control at individual-level. FDR-corrected p values are also provided.

| <b>Human Symbol</b> | <b>Fly GeneID</b> | <b>FlyBaseID</b> | <b>Fly Symbol</b> |
|---------------------|-------------------|------------------|-------------------|
| <i>AFF1</i>         | 33496             | FBgn0041111      | lilli             |
| <i>DDR2</i>         | 3346209           | FBgn0053531      | Ddr               |
| <i>GNA13</i>        | 3355131           | FBgn0000384      | cta               |
| <i>HSPB8</i>        | 32955             | FBgn0031037      | CG14207           |
| <i>ITGA6</i>        | 32275             | FBgn0004456      | mew               |
| <i>KANK2</i>        | 36668             | FBgn0027596      | Kank              |
| <i>NEK6</i>         | 31696             | FBgn0029970      | Nek2              |
| <i>NFE2L2</i>       | 42743             | FBgn0262975      | cnc               |
| <i>STOM</i>         | 38562             | FBgn0260657      | CG42540           |
| <i>TIMP3</i>        | 41248             | FBgn0025879      | Timp              |
| <i>TNFRSF1A</i>     | 37216             | FBgn0086358      | Tab2              |

**Table S9:** *Drosophila* ortholog genes.

| <b>BDSC ID</b> | <b>Note</b>       |
|----------------|-------------------|
| 26314          | lilli RNAi        |
| 55906          | Ddr RNAi          |
| 31132          | cta RNAi          |
| 64571          | CG14207 RNAi      |
| 27543          | mew RNAi          |
| 33432          | Kank RNAi         |
| 28600          | Nek2 RNAi         |
| 25984          | cnc RNAi          |
| 65975          | CG42540 RNAi      |
| 61294          | Timp RNAi         |
| 29417          | Tab2 RNAi         |
| 51363          | UAS-Tau           |
| 9146           | GMR-Gal4          |
| 3703           | Balancer          |
| 3605           | w[1118] wildtype  |
| 64349          | Canton-S wildtype |

**Table S10:** *Drosophila* lines used and their ID from the Bloomington *Drosophila* Stock Center.

## Supplementary References

- 1 Jiang, J., Wang, C., Qi, R., Fu, H. & Ma, Q. scREAD: A Single-Cell RNA-Seq Database for Alzheimer's Disease. *iScience* **23**, 101769 (2020). <https://doi.org:10.1016/j.isci.2020.101769>
- 2 McKenzie, A. T. *et al.* Brain Cell Type Specific Gene Expression and Co-expression Network Architectures. *Sci Rep-Uk* **8** (2018). <https://doi.org:ARTN> 8868  
10.1038/s41598-018-27293-5
